# Supplementary material for: Hydrogen sulfide blocks HIV rebound by maintaining mitochondrial bioenergetics and redox homeostasis
Source: eLife. 2021 Nov 18;10:e68487. doi: 10.7554/eLife.68487 (PMC8660018; doi:10.7554/eLife.68487)
Supplement: Figure 1—source data 3. [file elife-68487-fig1-data3.xlsx]

## Sheet: Figure 1C-D-source data
Figure 1-source data 3
	U1+PMA
Avg	6 h	12 h	24 h	36 h
cbs	1.45461	1.64354	1.39728	1.69821
cth	1.55281	1.67627	-3.037	-6.11125
mpst	1.58878	-1.46925	-1.23592	-2.28957
gag	6.34105	20.0777	100.926	492.122
SD	6 h	12 h	24 h	36 h
cbs	0.351033	0.0646906	0.612841	0.583747
cth	0.573843	0.284659	0.496229	0.639803
mpst	0.366729	0.0216029	0.210983	0.0336644
gag	1.16121	1.87804	5.46672	10.107

## Sheet: Figure 1F-source data
	U937+PMA
Avg	6 h	12 h	24 h	36 h
cbs	1.23221	1.27899	-3.86709	-1.32487
cth	1.45494	1.01215	2.10684	6.3258
mpst	-1.63241	-1.53987	-1.27726	1.67503
SD	6 h	12 h	24 h	36 h
cbs	0.0724312	0.00626869	0.227314	0.168377
cth	0.304387	0.321821	0.0309775	0.37184
mpst	0.480912	0.135676	0.382269	0.180267

## Sheet: Figure 1I-source data
U1	U1+PMA	U937	U937+PMA
23.45	13.424	34.729	73.077
22.596	18.975	28.24	67.595
23.898	16.353	32.48	52.471
24.313	13.744	33.022	59.54
24.235	13.277	26.449	50.303
22.639	14.408	20.271	66.186
21.349	15.626	27.788	53.689
24.861	12.647	25.154	59.52
21.807	13.613	29.452	56.26
22.12	16.357	25.111	60.486
31.434	15.941	28.303	61.181
25.265	14.429	23.683	65.294
27.223	15.95	23.351	54.418
21.259	16.294	23.418	65.582
17.56	21.084	26.005	52.74
24.982	18.366	23.413	66.277
21.699	18.021	30.394	51.107
17.675	19.387	36.981	58.927
25.518	17.567	21.885	52.056
26.916	16.945	36.404	63.458
22.958	16.845	28.418	57.424
22.958	15.357	24.885	59.927
29.313	13	29.058	58.927
21.639	15.252	30.678	44.486
29.781	12.651	30.115	53.627
27.409	12.029	27.394	52.192
21.766	10.013	34.606	48.424
32.448	12.206	26.433	57.605
30.099	13.403	26.178	48.746
23.057	18.765	24.577	62.927
28.901	16.269	28.909	55.339
32.938	13.319	28.034	49.147
21.875	12.206	21.678	51.599
28.781	13.038	22.236	58.282
32.214	14.983	22.37	47.723
23.125	13.605	26.452	63.028
31.26	14.387	31.962	69.192
19.151	9.832	25.101	65.458
27.365	13.592	21.231	62.667
21.573	12.45	30.337	70.401
24.432	13.349	28.74	55.836
22.38	10.471	22.538	54.977
23.042	9.466	20.774	57.299
22.302	14.437	25.192	56.429
22.401	13.068	25.62	54.48
22.135	14.317	24.803	59.571
20.802	14.509	22.558	46.853
17.49	16.02	18.543	56.266
27.75	12.744	31.316	60.028
21.935	13.188	36.707	46.667
22.481	15.973	30.067	63.635
23.833	12.14	26.671	69.051
20.046	15.747	28.084	64.269
22.231	16.321	24.307	61.891
24.569	11.829	26.289	62.949
24.12	9.379	34.382	67.115
20.977	9.461	31.72	50.532
19.44	14.515	28.24	61.763
17.227	12.898	25.862	63.679
26.556	14.362	28.24	69.051
