# Supplementary material for: Hydrogen sulfide blocks HIV rebound by maintaining mitochondrial bioenergetics and redox homeostasis
Source: eLife. 2021 Nov 18;10:e68487. doi: 10.7554/eLife.68487 (PMC8660018; doi:10.7554/eLife.68487)
Supplement: Figure 2—source data 2. [file elife-68487-fig2-data2.xlsx]

## Sheet: Figure 2A-source data
FIgure 2-source data 2
Avg	shNT	shCTH E8	shCTH E9
cth	0.999997	0.054666	1.41674
SD	shNT	shCTH E8	shCTH E9
cth	3.59358e-06	0.0051897	0.188475

## Sheet: Figure 2C-source data
	Untreated		PMA
shNT	1.00014	1.03252	76.4934	71.2192
shCTH	17.1742	15.8589	214.003	178.442

## Sheet: Figure 2D-source data
Avg	shNT untreated	shCTH untreated	shNT PMA	shCTH PMA
6	0.255	1.78	2.155	8.115
12	0.15	2.525	8.9225	21.695
24	0.175	3.275	24.765	40.8125
36	0.195	3.65	34.85	48.0825
SD	shNT untreated	shCTH untreated	shNT PMA	shCTH PMA
6	0.0212132	0.296985	2.27688	4.75883
12	0	0.0212132	0.576292	3.52846
24	0.0777817	0.0919239	1.54856	3.55321
36	0.0494975	0.19799	2.2981	4.19668

## Sheet: Figure 2E-source data
	shNT untreated		shCTH untreated		shNT PMA		shCTH PMA
12	0.11978	0.11486	0.4918	0.50918	0.57412	0.57166	3.312	2.39
24	0.19024	0.18424	0.5985	0.59506	3.1846	3.1318	7.47	7.064
36	0.23266	0.22782	0.62492	0.62086	5.893	5.8838	11.528	12.16
