# Supplementary material for: Hydrogen sulfide blocks HIV rebound by maintaining mitochondrial bioenergetics and redox homeostasis
Source: eLife. 2021 Nov 18;10:e68487. doi: 10.7554/eLife.68487 (PMC8660018; doi:10.7554/eLife.68487)
Supplement: Figure 2—source data 3. [file elife-68487-fig2-data3.xlsx]

## Sheet: Sheet1
Figure 2-source data 3. This file contains raw values associated with the NanoString analysis of host genes affected upon depletion of CTH in U1.
Gene Name	shNT	shNT	shCTH	shCTH	shNT+PMA	shNT+PMA	shCTH+PMA	shCTH+PMA
AHCY	6800.61	6798.82	3007.09	3079.2	1541.84	1618.61	804.5	860.85
AKR1C2	25.9	20	20	20	20	20	20	20
ALB	20	20	20	20	167.91	144.61	70.15	81.03
ALOX12	20	20	20	20	20	20	20	20
AOX1	20	20	22.11	20	20	20	20	20
APOBEC3G	234.38	201	108.63	90.2	198.53	187.99	104.49	113
APOE	40.71	48.92	30.76	28.24	20	27.89	21.19	25.28
ATOX1	2007	1951.48	1489.12	1382.74	895.87	941	675.16	735.96
BAD	193.67	232.9	158.62	141.96	143.22	136.35	94.26	98.13
BAG2	699.43	740.18	499.9	483.13	178.78	223.11	152.72	167.26
BANF1	3394.76	3101.1	2070.74	1902.73	1205.03	1173.42	780.38	832.61
BAX	3677.24	3480.76	1997.68	1939.6	2444.62	2646.38	1357.63	1471.93
BCL2	555.1	417.95	453.76	439.21	155.07	165.27	151.98	132.32
BHMT	20	20	20	20	20	20	20	20
BNIP3	1022.62	969.89	7734.99	7048.59	522.51	467.92	5217.17	4695.3
BTRC	462.58	458.36	280.71	292.55	327.93	341.9	189.98	197
CASP3	1773.86	1800.47	1415.1	1273.72	1021.31	1054.63	827.15	832.61
CASP8	963.41	926.29	743.12	672.15	973.9	936.87	651.05	642.3
CAT	11705.2	11386.7	6447.75	6002.32	1934.96	1907.83	1090.93	1128.48
CBS	20	23.4	20	20	20	20	20	20
CBX5	2396.81	2510.87	1287.24	1253.33	974.89	1005.05	558.98	523.35
CCL2	38.24	40.41	159.58	194.51	1385.78	1469.87	168.06	173.96
CCL3	71.55	49.98	284.56	264.31	2598.71	2455.29	2450.75	2562.49
CCL4	20	20	23.07	20	111.61	127.05	122.03	181.39
CCL5	2555.94	2528.95	1940.96	2047.83	3795.84	3929.29	2461.72	2540.93
CCL8	20	20	20	20	20	20	20	20
CCNT1	1375.42	1209.17	823.87	795.29	802.03	790.2	430.38	470.57
CCR2	20	20	25.96	20	20	20	20	20
CCR3	20	21.27	20	20	20	20	20	20
CCR4	20	20	24.03	31.37	20	20	20	29.74
CCR5	20	20	23.07	20	20	20	20	20
CCS	414.48	363.71	283.6	267.45	277.55	319.18	189.25	180.65
CD209	20	20	20	20.39	60.25	80.57	24.84	23.05
CD247	20	20	20	20	35.56	22.72	20	20
CD4	2325.26	2075.91	1575.65	1499.6	787.22	754.04	519.52	516.66
CD44	2578.14	2314.13	1581.41	1450.97	2638.22	2492.47	1390.51	1492.74
CD69	165.3	135.06	325.9	338.82	233.1	249.97	210.44	219.3
CD74	1794.83	1626.06	1086.32	967.84	906.73	887.29	507.83	544.91
CDK7	791.95	713.59	624.87	577.25	563.99	572.25	380.69	396.97
CDK9	689.56	611.5	461.45	457.25	407.93	426.6	251.36	266.14
CDKN1A	239.31	219.08	326.86	334.12	4024.99	4005.73	2104.4	2024.27
CDO1	20	20	20	20	65.19	47.52	35.8	27.51
CEBPB	4670.26	4194.36	4787.5	4837.62	8958.68	9059.88	4091.9	4141.47
COPS6	10065.8	9760.6	7308.15	6926.23	5343.6	5275.2	3573.83	3540.06
CR2	29.61	25.52	54.8	48.63	22.72	24.79	43.11	49.81
CSAD	32.07	28.71	20	20	20	20	20	20
CTH	695.73	730.61	392.23	356.86	751.66	774.7	59.92	57.99
CX3CL1	20	20	20	20	20	20	20	20
CXCL12	20	20	20	20	20	20	20	20
CXCL8	592.11	505.15	8366.59	8854.85	12612.3	12636.9	9282.76	8908.13
CXCR4	18001.3	16610.5	20139.2	19669.7	3162.7	3036.83	5747.66	5707.81
CYBB	225.74	211.63	275.91	323.92	1073.66	1088.71	482.26	469.83
CYGB	20	20	20	20	20.74	20	20	20
DHCR24	527.96	496.64	1047.87	1106.66	396.08	379.09	645.2	637.09
DUOX1	20	20	20	20	20	20	20	20
DUOX2	20	20	20	20	35.56	34.09	29.96	20.82
DUSP1	76.48	72.32	80.75	93.33	170.88	178.7	107.41	118.94
ELANE	81.41	72.32	58.64	47.84	25.68	20	20	20
EP300	733.97	671.05	651.79	649.41	464.23	511.3	405.54	344.94
EPHX2	24.67	20	20.19	20	22.72	26.86	20	20
EPX	20	20	20	20	20	20	20	20
ETHE1	1157.08	1137.92	776.77	720.78	2046.57	2017.32	1158.88	1166.39
FCAR	187.5	190.36	465.29	503.53	2494.01	2465.62	1623.61	1537.35
FHL2	176.4	178.66	129.78	138.04	166.93	171.47	74.53	83.26
FOS	403.37	360.52	602.76	640.78	3079.73	2980.02	1397.82	1378.26
FOXM1	1977.4	1822.8	1378.57	1290.19	795.12	767.47	530.49	495.1
FTH1	23289.6	21540.8	23403	24559.1	352877	350195	190033	191911
GADD45A	189.97	173.35	330.7	330.98	73.09	71.27	65.76	73.6
GCLC	1615.96	1501.63	825.8	839.21	1225.77	1263.28	938.21	918.1
GCLM	1486.44	1451.65	1045.94	1017.25	1027.24	1013.31	453.76	481.72
GGT1	378.7	352.01	191.31	164.7	179.77	174.57	94.99	86.98
GLA	1675.17	1510.14	703.71	770.98	995.63	1006.08	538.52	556.06
GNMT	20	20	20	20	20	20	20	20
GOT1	389.8	317.98	306.67	294.12	316.07	319.18	110.34	123.4
GOT2	2367.2	2204.59	1317.04	1279.21	918.59	892.46	421.61	457.93
GPX1	2679.29	2732.08	2056.32	1979.6	3795.84	4024.32	2953.47	3001.1
GPX2	20	20	20	20	20	20	20	20
GPX3	20	20	20	20	20	20	20	20
GPX4	8558.43	7968.64	4669.26	4564.68	7274.61	7450.57	4099.21	4332.52
GPX5	20	20	20	20	20	20	20	20
GSR	3815.4	3477.57	2787.9	2797.63	2851.57	2673.24	2004.3	2227.22
GSS	948.61	847.59	610.45	583.53	405.96	448.29	319.31	356.83
GSTP1	33364.1	32080.9	18260.8	16725.4	8306.79	8218.04	4798.48	5133.9
GSTZ1	108.55	129.74	81.71	74.51	81.98	77.47	35.8	37.17
HMOX1	165.3	152.08	157.66	126.27	1919.15	1909.9	920.68	1013.25
HSP90AA1	16329.9	15481	15055.6	14606.2	8576.43	8523.79	6450.59	6738.9
HSPA1A	37.01	23.4	49.03	33.73	46.42	42.35	27.04	37.17
HTATSF1	1079.36	1024.13	738.31	683.13	435.59	497.88	273.28	315.2
IFNA1	20	20	20	20	20	20	20	20
IFNB1	20	20	20	20	20	20	20	20
IFNG	20	20	20	20	20	20	20	20
IL10	20	20	20	20	20	20	20	20
IL12B	20	20	20	20	20	20	20	20
IL16	99.92	85.08	83.64	73.73	114.58	112.59	72.34	86.98
IL1B	20	20	20	36.08	1397.63	1302.53	1020.78	982.03
IL2	20	20	20	20	20	25.82	20	20
IRF1	69.08	68.06	70.18	62.74	40.5	64.04	35.8	33.45
IRF2	843.75	776.34	472.98	465.1	904.76	854.24	554.6	556.06
KLRD1	20	20	20	20	20	20	20	20
KRT1	20	20	20	20	20	20	20	20
LHPP	794.41	762.51	367.23	370.98	353.61	365.66	199.48	206.66
LPO	20	20	20	20	20	20	20	20
LTBR	767.27	713.59	462.41	417.25	559.05	569.15	283.51	321.89
MAP3K5	181.33	142.51	116.32	135.69	106.67	92.96	79.65	70.62
MAT1A	20	20	20	20	32.59	30.99	20	23.79
MAT2A	4873.79	3889.14	1902.5	1924.69	2268.81	2273.49	851.26	882.41
MB	20	22.33	22.11	20	90.87	122.92	38	43.86
MBL2	20	20	20	20	35.56	20.66	20	26.02
MPO	20	20	20	20	20	20	20	20
MPST	1873.78	1978.07	1003.64	1087.84	805.99	819.12	576.52	527.07
MPV17	1560.45	1525.03	1034.41	1008.62	915.62	913.12	740.2	734.48
MSRA	1390.22	1337.86	893.09	896.47	1120.08	1184.78	685.39	695.82
MT3	20	20	20	20	20	20	20	20
MTR	1342.11	1261.29	1483.36	1365.48	384.23	442.1	483.72	415.56
NCF1	222.04	224.39	4045.34	4327.82	23516.8	22412.6	24954.7	22504.9
NCF2	307.16	269.06	273.98	261.96	1692.96	1708.48	1034.67	1030.35
NCOA7	287.42	236.09	285.52	282.35	302.24	323.31	150.52	155.37
NFATC1	313.32	288.2	247.07	242.35	279.53	273.73	236.01	223.02
NFKBIA	1733.15	1674.98	1533.35	1649.4	3371.11	3465.5	1699.6	1750.7
NOS2	20	20	20	20	44.45	57.84	29.96	26.02
NOX4	20	20	20	20	20.74	24.79	20	20
NOX5	20	20	20	20	20	20	20	20
NQO1	964.64	899.7	470.1	501.96	2155.22	2215.65	895.83	869.78
NUDT1	1611.03	1535.66	817.14	742.74	530.41	505.11	279.86	300.33
PDLIM1	20	24.46	20	20	22.72	27.89	20	20
PPIA	1611.03	1472.92	1059.4	1063.52	541.27	535.06	520.26	535.99
PRDX1	7352.01	7163.59	5674.82	5528.6	5215.2	5379.53	4369.56	4820.93
PRDX2	28.37	28.71	24.99	23.53	20	20	20	20
PRDX3	11113.1	10357.2	6808.25	6555.26	5538.19	5225.62	3347.32	3353.47
PRDX4	3350.35	3272.32	2406.25	2286.26	964.02	1014.34	831.53	872.01
PRDX5	4445.75	4316.66	3067.65	2908.22	2390.3	2459.42	1750.75	1813.89
PRDX6	3735.22	3587.11	2431.24	2299.59	1469.74	1525.65	1392.71	1487.54
PRNP	2219.17	1892.99	2388.94	2309.01	2402.15	2314.81	1568.8	1569.31
PTGR1	20	20	20	20	29.63	36.15	20	20
PTGS1	1334.71	1278.3	1069.98	985.88	1022.3	1033.97	962.33	897.28
PTGS2	20	22.33	31.72	31.37	37.53	38.22	62.84	44.6
PTK2B	2422.71	2201.4	2002.48	1869.01	2014.96	2051.41	1343.75	1255.6
RBL2	1555.52	1436.76	960.38	935.68	808.95	826.35	582.36	585.8
RNF7	2855.69	2821.41	2736.95	2662.73	2086.08	2229.08	1855.97	1897.89
SELL	66.61	35.09	30.76	20	26.67	29.96	20	20.82
SEPP1	20	20	20	20	20	20	20	20
SERPINA1	91.28	95.71	142.28	145.1	268.66	279.93	198.02	243.09
SERPINC1	20	20	20	20	29.63	30.99	23.38	20
SFTPD	20	20	20	20	20	20	20	20
SIRT2	1845.4	1779.2	1095.93	1036.07	1374.92	1362.44	959.4	893.56
SLC7A11	342.93	365.84	770.04	767.84	2224.36	2197.05	768.69	677.24
SLPI	85.12	113.79	80.75	79.22	20	20	20	20
SMARCB1	1532.08	1426.12	1213.22	1103.52	768.45	774.7	512.22	579.11
SOD1	321.96	363.71	226.88	214.9	186.68	198.32	151.25	171.72
SOD2	1752.89	1616.49	1440.1	1387.44	2126.58	2044.18	805.96	859.37
SOD3	20	20	20	20	20	20	20	20
SPINK1	20	20	20	20	20	20	20	20
SQRDL	6431.78	6051.19	5233.57	5072.13	10632.9	11078.2	5807.57	5906.29
SQSTM1	3915.32	3725.36	3660.8	3805.47	9638.24	9467.89	5811.96	6064.64
SRXN1	967.11	944.37	543.16	519.21	926.49	859.4	439.15	459.42
STAT1	5331.44	4973.89	3300.3	3220.37	4678.86	4914.71	2753.99	2807.81
STAT3	695.73	716.78	607.57	530.98	764.5	836.68	666.39	636.35
SUOX	20	20	20	20	20	20	20	20
TGFB1	3138.18	3017.09	3072.46	3168.61	7169.91	6994.01	5506.53	5574.74
TNF	170.23	145.7	261.49	256.47	1138.85	1296.33	507.83	513.69
TNFRSF1B	590.87	575.34	735.43	663.53	1973.48	1927.46	1929.04	1796.05
TNFSF10	102.39	78.7	85.56	109.8	50.37	75.4	44.57	49.06
TPO	20	20	20	20	34.57	35.12	20	22.3
TRAPPC6A	453.95	389.23	337.43	327.06	175.82	190.06	155.64	166.52
TRIM5	220.81	186.11	196.11	191.37	161.99	138.41	103.76	103.33
TST	3956.02	3622.21	1776.57	1690.97	1624.81	1631.01	930.91	950.06
TTN	20	20	20	20	20	20	20	20
TXN	21556.5	20985.6	12849.4	12049.3	13859.8	14206	8202.79	8715.59
TXNRD1	5689.18	5314.2	3246.46	3265.86	5325.82	5596.45	2686.04	2700.02
TXNRD2	891.86	893.32	574.88	563.92	466.21	471.02	303.97	288.44
UCP2	1350.75	1216.62	719.09	676.86	469.17	481.35	320.04	354.6
VIMP	49.34	43.6	68.26	56.47	49.39	54.75	35.8	42.37
VPS4A	1090.47	1042.21	682.56	669.8	616.34	693.1	415.77	413.33
XCL1	20	20	20	20	28.64	29.96	20	20
XPO1	10369.3	9689.35	8112.8	7924.66	5058.15	5109.93	3787.93	3567.56
YY1	3268.93	3107.48	2516.8	2403.12	1877.67	1889.24	1402.21	1405.02
ABCF1	2523.86	2467.27	1744.84	1696.46	1393.68	1451.28	734.35	712.92
ACTB	83917.8	77918.9	62201.9	61113.4	75080.1	72666	54275.4	54581
B2M	49310.3	49310.3	49310.3	49310.3	49310.3	49310.3	49310.3	49310.3
GUSB	5328.98	5127.03	3074.38	3145.08	2180.9	2218.75	1378.82	1405.76
HPRT1	3701.91	3727.49	3506.99	3293.31	1741.36	1687.82	1864.74	1818.35
HSP90AB1	16701.2	14635.6	12048.5	11443.1	7144.23	7239.85	5481.68	5000.09
LDHA	14247.6	13223.3	43263.4	40566.8	8755.21	8754.13	39967.6	38849.9
POLR1B	750	687.01	547.01	536.47	295.33	303.68	177.56	152.4
RPLP0	96234.9	95061.1	61301.2	57797.3	39340.2	39126.6	27826.4	28281.8
