# Supplementary material for: Hydrogen sulfide blocks HIV rebound by maintaining mitochondrial bioenergetics and redox homeostasis
Source: eLife. 2021 Nov 18;10:e68487. doi: 10.7554/eLife.68487 (PMC8660018; doi:10.7554/eLife.68487)
Supplement: Figure 3—source data 1. [file elife-68487-fig3-data1.xlsx]

## Sheet: Figure 3A-source data
Figure 3-source data 1
	shNT		shCTH
Total Glutathione	56.1876	53.9325	52.2667	53.8295
	shNT		shCTH
GSSG	2.35395	2.42816	6.58019	8.1611
GSH/GSSG	22.8695	21.1994	6.94304	7.22709

## Sheet: Figure 3B-source data
Time (minutes)	shNT		shNT+PMA		shCTH		shCTH+PMA
0	1	1.0152	1.07903	1.02432	1	0.983402	1.11203	1.13693
30	1.25836	1.2614	1.29483	1.23708	1.32365	1.3527	1.47718	1.43568
60	1.33739	1.37994	1.34954	1.39818	1.68465	1.6556	1.73859	1.83817
240	1.35866	1.32523	1.45897	1.44985	1.71784	1.73029	1.99585	1.9834

## Sheet: Figure 3D-source data
Time (minutes)	shNT		shCTH
X	Mean	SD	Mean	SD
1.59082	52.7974	6.29147	64.6306	3.71655
8.18964	46.7606	5.56764	58.6643	3.52895
14.7865	43.6528	4.8424	56.5387	3.26764
21.4759	19.7908	2.39273	49.2277	2.76314
28.0774	19.5668	2.437	48.8448	2.61002
34.6755	19.6312	2.30677	48.8623	2.5723
41.3568	70.9615	0.430679	64.8424	4.24098
47.9621	68.328	5.03435	59.5849	3.97945
54.5648	68.1542	8.05538	56.87	3.76268
61.2498	14.9737	1.50559	40.9968	2.32419
67.858	15.0582	1.92185	41.572	2.29272
74.4647	14.8584	1.63664	41.4141	2.21155

## Sheet: Figure 3E-source data
	shNT		shCTH
nmOCR	16.495	13.2217	43.2567	43.975
Basal Respiration	32.0002	25.5887	14.7967	17.3119
Maximal Respiration	59.7146	46.8771	16.6159	17.3695
H+ Proton leak	5.44295	4.10271	6.43053	8.87248
ATP production	26.5572	21.486	8.2662	8.43943
SRC	27.7144	21.2884	1.81921	0.0575832
Coupling Efficiency	82.9909	83.9667	56.5409	48.7493
