# Supplementary material for: Hydrogen sulfide blocks HIV rebound by maintaining mitochondrial bioenergetics and redox homeostasis
Source: eLife. 2021 Nov 18;10:e68487. doi: 10.7554/eLife.68487 (PMC8660018; doi:10.7554/eLife.68487)
Supplement: Figure 4—source data 1. [file elife-68487-fig4-data1.xlsx]

## Sheet: Figure 4A-source data
Figure 4-Source data 1
Time (h)	300 µM NaHS	300 µM GYY4137	5 mM GYY4137
0.08	193.75
0.25	56.25
0.5	29.55
1	9.25	67.15
24	6.95	64.75	238.05
48	9.45	53.05	222.15
72	2.05	73.85	228.85
96	2.05	72.85	250.65
120	2.05	76.35	240

## Sheet: Figure 4B-source data
	Untreated		PMA		GYY4137 + PMA		NAC + PMA
Time (h)	Mean	SD	Mean	SD	Mean	SD	Mean	SD
24	1	0	41.3911	2.43303	25.2061	1.11152	15.0555	1.17945
48	4.19927	0.0823221	630.917	83.2495	59.7638	10.4907	23.3768	6.3369

## Sheet: Figure 4C-source data
	Untreated		PMA		GYY4137 + PMA		NAC + PMA
Time (h)	Mean	SD	Mean	SD	Mean	SD	Mean	SD
0	0.3716	0.040729	0.3808	0.040729	0.2527	0.010041	0.1946	0.033658
24	0.2044	0.02687	2.9539	0.004667	0.1559	0.078772	0.2493	0.043416
48	1.078	0.407294	5.78	0.705542	0.802	0.446891	1.211	0.745291

## Sheet: Figure 4D-source data
Time (h)	Untreated		TNF-ɑ		GYY4137+TNF-ɑ		NAC+TNF-ɑ
24	1	0	42.3257	4.14238	9.66634	2.66593	3.3533	1.71085
48	0.994262	0.0681708	169.533	5.81538	17.7127	3.79052	34.1183	7.46465

## Sheet: Figure 4E-source data
	shNT		shNT+GYY4137		shCTH		shCTH+GYY4137
untreated	0.1656	0.1588	0.096	0.105775	1.38837	1.363	0.676	0.6625
PMA treated	2.09463	1.94162	0.702	0.95675	4.5175	4.72625	1.535	1.3425

## Sheet: Figure 4F-source data
	untreated		PMA
J1.1	1.00001	1.01782	38.0297	39.3782
NAC	0.822335	0.939945	27.5467	28.3285
5 mM GYY4137	0.953834	0.916164	32.9922	34.339
2.5 mM GYY4137	0.693704	0.639368	32.2431	31.0826
1.25 mM GYY4137	0.576702	0.643672	21.7031	24.53
0.625 mM GYY4137	0.645899	0.71488	19.7994	18.1839
0.3 mM GYY4137	0.743878	0.875807	24.2152	18.8383

## Sheet: Figure 4G-source data
	Donor 1
Time (days)	HIV-NL4.3	HIV-NL4.3+GYY4137
0	0.22	0.305
3	29.8	17.2125
5	40.9175	23.825
	Donor 2
Time (days)	HIV-NL4.3	HIV-NL4.3+GYY4137
0	0.205	0.205
3	16.975	11.8025
5	43.8825	23.6925
	Donor 3
Time (days)	HIV-NL4.3	HIV-NL4.3+GYY4137
0	0.22	0.22
3	4.5475	1.9275
5	25.85	7.1525
