# Supplementary material for: Hydrogen sulfide blocks HIV rebound by maintaining mitochondrial bioenergetics and redox homeostasis
Source: eLife. 2021 Nov 18;10:e68487. doi: 10.7554/eLife.68487 (PMC8660018; doi:10.7554/eLife.68487)
Supplement: Figure 5—source data 1. [file elife-68487-fig5-data1.xlsx]

## Sheet: complete 185 genes list
Figure 5-source data 1. This file contains raw values associated with the NanoString analysis of host genes affected upon PMA induced HIV reactivation in presence or absence of GYY4137 treatment.
Gene name	Untreated U1	Untreated U1	5mM GYY4137	5mM GYY4137	PMA	PMA	5mM GYY4137+PMA	5mM GYY4137+PMA
AHCY	2812.11	2818.26	2603.1	2458.17	879.75	777.76	1326.55	1354.66
AKR1C2	12.16	16.19	13.32	11.63	14.87	13.18	11.35	10.17
ALB	12.16	12.48	53.21	40.72	91.71	104.97	249.55	235.99
ALOX12	12.16	12.48	13.32	9.28	14.87	13.18	11.35	10.17
AOX1	12.16	12.48	13.32	9.28	17.06	13.18	11.35	10.17
APOBEC3G	84.66	98.67	79.81	60.49	85.31	100.04	50.89	59
APOE	26.81	28.52	23.53	22.1	42.65	30.29	31.19	27.23
ATOX1	1116.8	1091.54	690.68	665.44	635.55	554.43	508.95	467.44
BAD	138.28	110.23	147.35	136.11	94.91	69.04	95.22	127.07
BAG2	393.67	428.6	406.22	330.39	274.05	296.59	292.24	310.87
BANF1	1394.77	1451.53	947.51	994.67	741.12	605.16	678.05	698.88
BAX	2098.85	2099.05	1718	1610.08	1978.1	1715.44	1553.12	1783.52
BCL2	249.75	277.51	311.06	241.98	132.23	133.85	88.66	95.3
BHMT	12.16	12.48	13.32	9.28	14.87	13.18	11.35	10.17
BNIP3	888.93	1573.32	600.64	1014.44	429.74	353.65	563.13	565.01
BTRC	255.39	255.15	316.18	273.39	255.93	225.44	495.81	458.36
CASP3	1019.44	1057.62	1148.06	1144.74	667.54	588.96	835.66	1071.02
CASP8	470.57	510.31	481.94	482.79	577.97	519.21	535.22	551.39
CAT	6398.15	7127.37	8670.86	9332.43	1282.83	1146.91	1666.4	1747.21
CBS	16.23	14.65	13.32	15.12	14.87	13.18	11.35	10.17
CBX5	1276.24	1385.23	1079.51	952.79	704.86	643.2	778.2	839.57
CCL2	21.87	14.65	16.37	16.29	470.27	488.21	90.3	95.3
CCL3	85.37	91.73	108.46	77.94	7269.38	5914.91	8755.57	7267.95
CCL4	12.16	12.48	13.32	9.28	985.32	982.77	1124.61	1080.09
CCL5	1452.62	1481.59	763.33	824.82	2006.89	1987.37	1083.57	1236.66
CCL8	12.16	12.48	13.32	9.28	14.87	13.18	11.35	10.17
CCNT1	646.23	655.23	674.31	630.54	533.18	449.47	737.16	794.19
CCR2	12.16	16.19	13.32	9.28	14.87	13.18	11.35	10.17
CCR3	12.16	12.48	13.32	9.28	14.87	13.18	11.35	10.17
CCR4	12.16	12.48	13.32	9.28	14.87	13.18	11.35	10.17
CCR5	12.16	12.48	13.32	9.28	14.87	13.18	11.35	10.17
CCS	219.41	227.4	304.92	261.75	287.92	226.85	469.55	494.67
CD209	12.16	15.42	18.42	19.78	68.25	45.09	59.1	52.19
CD247	12.16	12.48	16.37	20.94	18.13	21.13	50.89	49.92
CD4	1326.33	1436.11	1016.07	1086.57	523.58	420.58	246.27	235.99
CD44	960.18	998.26	1256.53	1127.29	1277.5	1070.12	3222.8	3530.73
CD69	49.38	57.81	65.49	65.15	50.12	47.2	42.69	52.19
CD74	745.71	813.26	473.76	437.42	426.54	419.17	147.76	201.95
CDK7	364.74	426.29	415.43	368.78	377.49	330.41	459.7	506.01
CDK9	423.3	434.76	404.18	339.7	348.7	324.07	451.49	499.2
CDKN1A	227.88	194.26	539.24	415.32	1884.26	1800.68	3524.88	3526.19
CDO1	12.16	12.48	22.51	25.59	66.11	38.04	78.81	70.34
CEBPB	2783.18	2805.16	4199.34	3685.51	7451.73	6637.72	9535.41	9884.23
COPS6	6722.68	7010.97	5919.39	5762.09	4807.16	4538.34	5155.16	5137.26
CR2	14.11	23.13	13.32	9.28	26.66	16.2	11.35	10.17
CSAD	12.7	12.48	18.42	22.1	33.06	19.73	11.35	29.5
CTH	326.64	295.24	814.49	685.22	146.09	130.33	2426.54	2568.63
CX3CL1	12.16	13.1	13.32	9.28	14.87	13.18	11.35	10.17
CXCL12	12.16	12.48	13.32	9.28	14.87	13.18	11.35	10.17
CXCL8	566.51	483.33	1138.86	714.3	6366.18	6268.57	50430.3	67446.9
CXCR4	13544.1	13203.3	15015.9	13298.3	689.94	672.79	466.26	621.74
CYBB	294.9	336.09	400.08	375.76	1066.36	929.22	630.44	739.73
CYGB	12.16	12.48	13.32	9.28	14.87	13.18	11.35	10.17
DHCR24	620.84	665.25	336.64	401.36	693.13	660.81	305.37	258.68
DUOX1	12.16	12.48	13.32	9.28	14.87	13.18	11.35	10.17
DUOX2	12.16	12.48	17.39	9.28	14.87	13.18	11.35	10.17
DUSP1	47.97	40.86	77.77	51.19	246.33	176.83	577.9	599.04
ELANE	40.92	44.71	29.67	33.74	14.87	13.18	34.48	27.23
EP300	380.97	390.06	472.73	388.56	356.16	300.11	541.78	599.04
EPHX2	12.16	15.42	19.44	9.28	18.13	16.91	11.35	10.17
EPX	12.16	12.48	13.32	9.28	14.87	13.18	11.35	10.17
ETHE1	600.38	526.5	435.9	408.34	988.52	925	812.68	844.11
FCAR	190.48	174.21	214.88	203.59	1823.48	1532.97	1648.34	2051.27
FHL2	132.63	137.98	35.81	36.06	121.57	90.17	57.46	56.73
FOS	349.93	386.2	463.52	369.95	1903.45	1568.2	1164.02	1064.21
FOXM1	1125.27	1083.83	780.72	713.14	411.62	400.86	344.77	378.94
FTH1	21411.1	20353	127359	102751	238446	221289	643243	631402
GADD45A	141.1	141.84	85.95	93.07	57.58	64.81	331.64	270.02
GCLC	737.95	696.86	974.12	823.65	933.07	806.64	1310.13	1316.08
GCLM	1189.47	1172.48	1850	1640.33	670.74	630.52	1773.11	1565.68
GGT1	194.72	201.97	201.58	184.97	91.71	78.2	55.82	56.73
GLA	1056.83	1079.97	1163.41	991.18	1279.63	1196.23	1150.88	1268.43
GNMT	14.11	12.48	16.37	9.28	19.19	13.18	11.35	10.17
GOT1	152.39	152.63	181.11	141.93	122.63	115.54	366.11	310.87
GOT2	1104.1	1065.33	662.03	610.76	541.71	522.73	541.78	540.05
GPX1	1494.24	1239.54	1951.3	1676.39	1647.53	1423.07	620.59	710.23
GPX2	12.16	12.48	14.33	9.28	14.87	13.18	11.35	10.17
GPX3	12.16	12.48	13.32	9.28	14.87	13.18	11.35	10.17
GPX4	5594.59	5173.24	5606.28	4895.39	4513.91	4165.66	7481.55	7810.26
GPX5	12.16	12.48	13.32	9.28	14.87	13.18	11.35	10.17
GSR	2162.35	2208.51	3238.52	3362.09	3398.49	3150.49	5964.56	6169.7
GSS	546.05	504.14	411.34	382.74	416.95	311.39	351.34	381.21
GSTP1	16617.3	17221.8	10642.6	11077.5	6391.77	5419.66	3776.07	3982.28
GSTZ1	59.97	65.52	55.25	55.84	54.38	42.97	54.18	49.92
HMOX1	395.78	336.09	4481.75	3622.68	2674.43	2214.22	10581.2	11130
HSP90AA1	14033.7	15070.3	7023.45	6845.18	9865.97	8642.71	6028.58	6049.44
HSPA1A	29.63	45.48	63.44	34.9	59.72	54.25	98.51	127.07
HTATSF1	575.69	592.79	425.66	429.28	266.59	283.91	280.74	292.71
IFNA1	12.7	12.48	13.32	9.28	14.87	13.18	11.35	10.17
IFNB1	12.16	12.48	13.32	9.28	14.87	13.18	11.35	10.17
IFNG	12.16	12.48	17.39	15.12	14.87	13.18	11.35	10.17
IL10	12.16	12.48	13.32	9.28	23.46	16.2	11.35	10.17
IL12B	12.16	12.48	13.32	9.28	14.87	13.18	11.35	10.17
IL16	40.92	56.27	45.02	57	53.32	45.79	27.91	10.17
IL1B	12.16	12.48	14.33	12.8	566.24	431.85	994.91	1075.56
IL2	12.16	12.48	14.33	9.28	21.33	15.5	24.63	10.17
IRF1	50.8	53.96	62.42	41.88	33.06	44.38	113.28	108.92
IRF2	488.2	468.68	699.89	527	526.78	461.44	533.58	501.47
KLRD1	12.16	12.48	13.32	9.28	14.87	13.18	11.35	10.17
KRT1	12.16	12.48	13.32	9.28	14.87	13.18	11.35	10.17
LHPP	424.71	425.51	250.69	260.59	235.67	233.89	211.79	176.99
LPO	12.16	12.48	13.32	9.28	14.87	13.18	11.35	10.17
LTBR	506.55	504.14	718.31	631.7	545.98	414.24	751.93	782.84
MAP3K5	90.3	84.79	101.3	74.45	78.91	64.81	111.64	95.3
MAT1A	14.82	12.48	21.49	17.45	28.79	21.84	32.84	36.31
MAT2A	2185.63	2664.09	1293.36	1031.9	1862.93	1339.94	1947.14	1819.82
MB	17.64	14.65	17.39	16.29	30.92	28.18	34.48	34.04
MBL2	14.11	13.1	13.32	9.28	28.79	17.61	22.98	29.5
MPO	12.16	13.88	13.32	9.28	16	13.18	11.35	10.17
MPST	1200.05	1194.06	1148.06	1012.12	526.78	444.53	696.11	778.3
MPV17	1232.5	1243.4	1202.3	973.73	973.59	838.35	1042.52	964.37
MSRA	816.26	825.59	862.58	795.73	893.61	778.46	1318.34	1347.85
MT3	12.16	12.48	13.32	9.28	18.13	13.18	11.35	10.17
MTR	666.69	685.29	600.64	558.41	383.89	289.55	371.04	338.1
NCF1	222.94	285.99	168.83	235	9386.11	7471.84	1494.01	1275.24
NCF2	210.24	204.28	395.99	362.97	1306.29	1184.96	2116.24	2062.62
NCOA7	162.97	148.78	195.44	161.71	169.55	171.19	197.01	197.41
NFATC1	212.35	199.65	285.48	251.28	166.35	166.26	272.53	251.87
NFKBIA	1055.42	901.91	1296.43	1012.12	2064.48	1982.44	2700.71	2843.19
NOS2	12.16	12.48	25.58	17.45	36.26	33.11	59.1	52.19
NOX4	12.16	12.48	16.37	9.28	14.87	14.79	29.55	10.17
NOX5	12.16	12.48	13.32	9.28	14.87	13.18	11.35	10.17
NQO1	721.02	559.64	960.81	894.62	1336.15	1306.83	655.07	614.93
NUDT1	936.19	913.47	630.31	608.43	310.31	305.04	313.58	272.29
PDLIM1	12.16	12.48	13.32	9.28	14.87	16.91	11.35	10.17
PPIA	788.75	764.69	268.09	295.49	294.32	322.66	49.25	72.61
PRDX1	6725.5	6387.34	3107.55	3285.31	7922	7614.85	4109.35	4440.64
PRDX2	24.69	26.21	21.49	20.94	14.87	13.18	11.35	10.17
PRDX3	6118.77	5924.83	3687.72	3491.23	3234.27	3194.87	1937.29	1765.36
PRDX4	1790.55	1846.21	814.49	937.66	975.72	824.26	912.82	1018.83
PRDX5	2971.55	2990.94	2560.12	2715.27	1629.4	1596.38	1553.12	1477.19
PRDX6	2177.87	2149.16	1154.2	1151.72	1869.33	1651.33	981.78	1066.48
PRNP	1113.27	1190.98	1645.35	1504.22	1259.37	1144.8	3058.62	2820.5
PTGR1	12.16	12.48	19.44	11.63	24.53	30.29	54.18	52.19
PTGS1	731.6	786.28	615.98	653.8	702.73	596.7	691.19	648.96
PTGS2	12.16	12.48	13.32	12.8	20.26	17.61	85.37	124.8
PTK2B	1329.86	1517.82	1342.48	1134.27	1674.19	1270.9	3061.9	3331.05
RBL2	688.56	711.5	837	724.77	403.08	329	528.65	555.93
RNF7	1705.19	1693.58	1943.11	1930	1608.07	1509.73	2252.51	2275.91
SELL	22.58	26.98	31.72	24.43	22.39	13.18	11.35	10.17
SEPP1	12.16	12.48	13.32	9.28	14.87	13.18	11.35	10.17
SERPINA1	83.95	80.94	64.46	58.17	148.22	159.22	50.89	38.57
SERPINC1	13.4	16.96	21.49	19.78	17.06	28.18	42.69	34.04
SFTPD	12.7	12.48	13.32	15.12	14.87	14.09	11.35	10.17
SIRT2	1380.66	1359.03	1691.4	1590.31	1155.94	1070.83	1232.97	1431.81
SLC7A11	155.21	164.96	1603.4	1227.34	791.24	593.89	5890.68	6221.89
SLPI	109.35	100.21	79.81	79.11	14.87	13.18	11.35	10.17
SMARCB1	831.08	846.4	645.66	528.16	456.4	430.44	395.67	406.17
SOD1	188.37	171.13	117.67	112.85	179.15	140.9	151.04	145.22
SOD2	1149.25	1112.35	1314.85	1163.35	1052.5	987.7	1697.59	1992.28
SOD3	12.16	12.48	13.32	9.28	14.87	13.18	11.35	10.17
SPINK1	12.16	12.48	13.32	17.45	14.87	13.18	142.83	108.92
SQRDL	3696.1	4049.33	4393.75	4257.88	6131.58	5533.78	6852.75	7215.76
SQSTM1	2445.96	2482.17	8485.65	7189.53	7390.95	6768.05	19671.7	20338
SRXN1	480.44	511.08	1121.46	1220.36	718.73	614.32	2618.63	2663.93
STAT1	3422.36	3465.79	4003.9	3601.74	3464.61	3107.51	5342.32	5284.75
STAT3	565.1	560.41	985.37	882.99	621.69	555.14	1313.42	1377.35
SUOX	12.16	14.65	15.35	9.28	19.19	13.18	11.35	10.17
TGFB1	2386.7	2275.58	1671.96	1548.42	6333.12	5824.74	4152.04	4073.05
TNF	93.83	100.21	111.53	76.78	1074.89	968.68	1022.82	1080.09
TNFRSF1B	360.51	369.24	406.22	368.78	1268.97	1148.32	1081.93	1039.25
TNFSF10	71.96	75.54	83.9	67.47	38.39	45.09	62.39	88.5
TPO	12.16	12.48	13.32	16.29	14.87	19.02	27.91	10.17
TRAPPC6A	229.99	240.51	204.65	214.06	87.44	77.49	132.98	140.68
TRIM5	131.93	142.61	125.86	120.99	123.7	140.9	305.37	401.63
TST	1945.05	1955.67	855.42	844.6	772.05	712.95	467.9	510.55
TTN	12.16	12.48	13.32	9.28	14.87	13.18	11.35	10.17
TXN	12041.4	12149.5	12332	13141.2	11402.6	10268	9665.11	9993.14
TXNRD1	3171.21	3258.42	4192.18	3911.2	3123.37	2865.17	7959.31	7667.31
TXNRD2	494.55	466.37	481.94	388.56	311.38	252.91	364.47	440.21
UCP2	557.34	656.77	514.68	492.1	556.64	447.35	392.38	347.17
VIMP	35.98	32.38	46.05	43.04	36.26	34.52	105.07	104.38
VPS4A	541.12	564.27	801.19	679.4	418.01	388.88	735.51	841.84
XCL1	12.16	12.48	13.32	9.28	14.87	13.18	45.97	59
XPO1	7199.59	7061.85	6369.61	5794.67	4144.95	3745.78	6219.03	6423.84
YY1	2330.96	2374.25	2490.54	2216.19	1533.43	1330.78	2190.12	2536.86
ABCF1	1695.31	1647.33	1345.55	1135.43	1052.5	911.61	1346.25	1422.73
ACTB	59091	57115.3	28663.8	28325.3	51154.4	46899.4	14982.8	13866.5
B2M	28688.3	28688.3	28688.3	28688.3	28688.3	28688.3	28688.3	28688.3
GUSB	3317.25	3720.17	2707.47	2728.07	1777.62	1528.04	1152.52	1229.86
HPRT1	1911.9	2160.72	1380.34	1521.67	1009.84	905.27	1081.93	1030.17
HSP90AB1	8836.34	9725.94	5425.17	5328.16	6690.35	5891.66	6302.76	6355.77
LDHA	13364.9	16309.1	4263.8	6255.35	7806.83	7658.53	1999.68	1876.55
POLR1B	439.52	484.1	344.83	353.66	266.59	255.03	316.86	319.94
RPLP0	39514.2	39868.1	46082.2	44456.4	17821	16543.6	35414.7	36546.2
