# Supplementary material for: Hydrogen sulfide blocks HIV rebound by maintaining mitochondrial bioenergetics and redox homeostasis
Source: eLife. 2021 Nov 18;10:e68487. doi: 10.7554/eLife.68487 (PMC8660018; doi:10.7554/eLife.68487)
Supplement: Figure 5—source data 4. [file elife-68487-fig5-data4.xlsx]

## Sheet: Figure 5E-source data
Figure 5-source data 4
	U1		U1-PMA		U1-GYY+PMA
	Mean	SD	Mean	SD	Mean	SD
ER	2.13516	0.125076	8.43282	0.0492744	4.61712	0.284847
GAPDH	0.886603	0.0280879	1.10373	0.0825255	1.04901	0.207035

## Sheet: Figure 5F-source data
	U1		U1-PMA		U1-GYY+PMA
	Mean	SD	Mean	SD	Mean	SD
RBEI	2.06075	0.00330584	1.00475	0.0396791	6.70723	0.112176
RBEIII	1.63737	0.512384	3.10445	0.63136	5.28463	0.081893
GAPDH	1.00175	0.226752	1.64504	0.235569	1.26885	0.19992
