# Supplementary material for: Hydrogen sulfide blocks HIV rebound by maintaining mitochondrial bioenergetics and redox homeostasis
Source: eLife. 2021 Nov 18;10:e68487. doi: 10.7554/eLife.68487 (PMC8660018; doi:10.7554/eLife.68487)
Supplement: Figure 6—source data 1. [file elife-68487-fig6-data1.xlsx]

## Sheet: Figure 6B-source data
Figure 6-source data 1
	Subject A		Subject B		Subject C		Subject D		Subject E
Time (Days)	ART	ART+GYY4137	ART	ART+GYY4137	ART	ART+GYY4137	ART	ART+GYY4137	ART	ART+GYY4137
7	8.99001	104.971	43.012	48.3766	6.75953	6.75953	9.61189	13.7379	3	613.116
14	883.921	673.794	317.838	139.824	164.654	6.75953	236.856	141.221	94.1128	457.771
21	172.348	3.21723	218.321	67.0787	49.4462	23.1583	184.327	41.5145	3	142.257
28	3	3	3	3	3	3	3	3	3	3

## Sheet: Figure 6C-6D-source data
	ART	ART + Pros	ART + GYY4137	ART + GYY4137 + Pros
Subject A	5.75959	62.8807	1.83615	13.2444
Subject B	1	120.143	1	7.86031
Subject C	1	133.347	2.21075	7.67783
Subject D	3	111.558	3	18.39
Subject E	3	85.31	3	3

## Sheet: Figure 6E-source data
	ART		ART+GYY4137
	Mean	SD	Mean	SD
0	1.1195	1.5422	1.1195	1.5422
7	90.65	5.3033	89.25	4.17193
14	80.8	7.63675	82.45	3.74767
21	75.55	10.5359	73.35	4.31335
28	57.1	9.75807	63.05	12.9401

## Sheet: Figure 6F-source data
	ART		ART+GYY4137
	Mean	SD	Mean	SD
0	88.9144	9.2241	82.392	0
7	43.2	0.707107	43.5	9.19239
14	54.65	5.86899	47.8	4.52548
21	63	14.5664	57.15	2.6163
28	61.5	16.122	65.95	4.31335

## Sheet: Figure 6G-source data
	ART					ART+GYY4137
ex vivo	2943.58	1122.5	8819.97	3997.61	1478.75	2943.58	1122.5	8819.97	3997.61	1478.75
14	1227.39	3008.77	1420.12	720.845	1012.62	1159.87	1393.7	2070.81	1543.51	1008.75
28	1527.55	804.658	4933.35	1024.16	390.438	2250.49	979.386	1953.1	838.762	697.738
