# Supplementary material for: Hydrogen sulfide blocks HIV rebound by maintaining mitochondrial bioenergetics and redox homeostasis
Source: eLife. 2021 Nov 18;10:e68487. doi: 10.7554/eLife.68487 (PMC8660018; doi:10.7554/eLife.68487)
Supplement: Figure 7—source data 1. [file elife-68487-fig7-data1.xlsx]

## Sheet: Figure 7A-source data
Figure 7-source data 1
Time (minutes)	ART		ART+GYY4137
X	Mean	SD	Mean	SD
1.58947	35.666	0.552431	31.2667	0.086248
8.18589	33.1726	0.315665	29.4321	0.033859
14.781	32.0064	0.997783	29.5097	0.062936
21.4586	11.9579	0.214607	11.3417	0.591922
28.0596	11.7641	0.26777	11.5209	0.08707
34.6565	11.6091	0.434941	11.5764	0.403259
41.3336	56.8448	0.684203	54.9063	2.696
47.9359	65.2654	2.11701	57.1786	0.003659
54.5339	72.4648	0.165144	58.9306	1.06198
61.216	12.9441	0.845089	12.5573	0.532924
67.8248	13.1111	0.452995	13.1344	0.095134
74.4332	13.2515	0.69238	12.9567	0.169947

## Sheet: Figure 7B-source data
Time (minutes)	ART		ART+GYY4137
X	Mean	SD	Mean	SD
1.58947	50.0496	6.65839	88.6698	7.7874
8.18589	48.2533	6.50464	86.5119	5.3973
14.781	48.7891	5.91755	87.556	4.05159
21.4586	29.9839	9.46327	38.6711	3.8173
28.0596	27.6322	10.9345	36.712	5.45641
34.6565	26.6454	8.5319	34.4602	5.92888
41.3336	112.471	9.44755	99.7152	5.96289
47.9359	115.186	8.79598	106.722	7.66275
54.5339	123.342	11.3338	113.311	6.90372
61.216	29.5779	10.2962	25.098	2.35427
67.8248	27.7099	10.0321	23.8666	3.87102
74.4332	27.1073	9.41771	25.3328	5.31333

## Sheet: Figure 7C-source data
	Pros		Pros+GYY4137
nmOCR	36.5251	17.6896	20.0194	30.6461
Basal Respiration	18.1816	25.1819	63.4849	60.9615
Maximal Respiration	98.1504	94.3183	100.195	75.7608
H+ Proton leak	-1.34771	0.42391	8.51188	9.74298
ATP production	19.5293	24.758	54.9731	51.2185
Spare Respiratory Capacity	79.9688	69.1364	36.7099	14.7993
Coupling Efficiency	107.413	98.3166	86.5923	84.0178

## Sheet: Figure 7D-source data
	unstimulated		Pros		GYY4137 + Pros
	Mean	SD	Mean	SD	Mean	SD
MitoSOX (RFU)	316	15.5563	412.5	14.8492	358	9.89949

## Sheet: Figure 7E-source data
	unstimulated		PMA/Iono		GYY4137 + PMA/Iono
	Mean	SD	Mean	SD	Mean	SD
MitoSOX (RFU)	380	60.8112	772	100.214	458	42.4264

## Sheet: Figure 7F-source data
	ART				ART+GYY4137				ART+Pros				ART+GYY4137+Pros
hmox1	1.00098	0.849741	1.00028	1.09104	2.9171	2.98406	11.2972	11.3958	1.27916	0.85399	3.91506	5.03416	13.3326	10.5975	13.8051	19.5538
trxrd1	1.00002	0.888486	1.00008	0.966506	1.60439	1.77148	3.50667	3.70472	0.446421	0.384656	1.17835	1.28802	3.10687	3.32366	1.53356	1.80615
gclc	1	1.06664	1.00007	0.898201	1.94379	2.12826	3.44651	3.55649	0.411909	0.240407	0.699193	0.840393	2.26954	2.28994	0.605147	0.789484
prdx1	1.00009	1.25543	1.00002	1.07598	2.30301	2.31345	4.09621	3.46226	0.340388	0.211799	0.600329	0.620594	1.95437	1.97663	0.628346	0.616341
