# Supplementary material for: Hydrogen sulfide blocks HIV rebound by maintaining mitochondrial bioenergetics and redox homeostasis
Source: eLife. 2021 Nov 18;10:e68487. doi: 10.7554/eLife.68487 (PMC8660018; doi:10.7554/eLife.68487)
Supplement: Supplementary file 1. — (a) Sequences of shRNA clones. (b). List of genes used for NanoString nCounter Gene Expression Analysis. (c). List of differentially expressed genes from NanoString nCounter Gene Expression analysis for U1-shNT, U1-shCTH, U1-shNT+ PMA and U1-shCTH+ PMA samples. (d). List of differentially expressed genes from NanoString nCounter Gene Expression analysis for U1 untreated, GYY4137, PMA and GYY4137+ PMA treated samples. (e). Characteristic of ART treated HIV-1 infected study participants. (f). List of primers and probes used in this study. [file elife-68487-supp1.xlsx]

## Sheet: Supplementary File 1a
Supplementary File 1a. Sequences of shRNA clones.
Gene name	Accession number	shRNA cat. No.	Sequence	code
CBS	NM_000071.2	NM_000071.1-409s1c1	CCGGCTTGCCAGATATTCTGAAGAACTCGAGTTCTTCAGAATATCTGGCAAGTTTTTG	C9
		NM_000071.1-1604s1c1	CCGGCCGTCAGACCAAGTTGGCAAACTCGAGTTTGCCAACTTGGTCTGACGGTTTTTG	C10
CTH	NM_001902.4,NM_153742.3	NM_001902.4-1472s1c1	CCGGGCACCTCATTATCTTTCATAACTCGAGTTATGAAAGATAATGAGGTGCTTTTTG	E8
		NM_001902.4-837s1c1	CCGGCCTTCATAATAGACTTCGTTTCTCGAGAAACGAAGTCTATTATGAAGGTTTTTG	E9

## Sheet: Supplementary File 1b
Supplementary File 1b. List of genes used for NanoString nCounter Gene Expression Analysis
Sl. no.	Gene name	Accession	Position	Target Sequence
1	ABCF1	NM_001090.2	851-950	GATGTCCTCCCGCCAAGCCATGTTAGAAAATGCATCTGACATCAAGCTGGAGAAGTTCAGCATCTCCGCTCATGGCAAGGAGCTGTTCGTCAATGCAGAC
2	ACTB	NM_001101.2	1011-1110	TGCAGAAGGAGATCACTGCCCTGGCACCCAGCACAATGAAGATCAAGATCATTGCTCCTCCTGAGCGCAAGTACTCCGTGTGGATCGGCGGCTCCATCCT
3	AHCY	NM_001161766.1	1147-1246	ATCCTTGGCCGGCACTTTGAGCAGATGAAGGATGATGCCATTGTGTGTAACATTGGACACTTTGACGTGGAGATCGATGTCAAGTGGCTCAACGAGAACG
4	AKR1C2	NM_001135241.2	256-355	CTGCAGAGGTTCCTAAAAGTAAAGCTCTAGAGGCCGTCAAATTGGCAATAGAAGCCGGGTTCCACCATATTGATTCTGCACATGTTTACAATAATGAGGA
5	ALB	NM_000477.5	856-955	TCTTACCAAAGTCCACACGGAATGCTGCCATGGAGATCTGCTTGAATGTGCTGATGACAGGGCGGACCTTGCCAAGTATATCTGTGAAAATCAAGATTCG
6	ALOX12	NM_000697.1	1946-2045	TTACAGCCCGGAATGAGCAACTTGACTGGCCCTATGAATATCTGAAGCCCAGCTGCATAGAGAACAGTGTCACCATCTGAGCCCTAGAGTGACTCTACCT
7	AOX1	NM_001159.3	1416-1515	GCGATAGTCAATTCAGGAATGAGAGTCTTTTTTGGAGAAGGGGATGGCATTATTAGAGAGTTATGCATCTCATATGGAGGCGTTGGTCCAGCCACCATCT
8	APOBEC3G	NM_021822.2	762-861	GAAAAGAGACGGTCCGCGTGCCACCATGAAGATCATGAATTATGACGAATTTCAGCACTGTTGGAGCAAGTTCGTGTACAGCCAAAGAGAGCTATTTGAG
9	APOE	NM_000041.2	97-196	GGGCTGCGTTGCTGGTCACATTCCTGGCAGGATGCCAGGCCAAGGTGGAGCAAGCGGTGGAGACAGAGCCGGAGCCCGAGCTGCGCCAGCAGACCGAGTG
10	ATOX1	NM_004045.3	144-243	GCTGAAGCTGTCTCTCGGGTCCTCAATAAGCTTGGAGGAGTTAAGTATGACATTGACCTGCCCAACAAGAAGGTCTGCATTGAATCTGAGCACAGCATGG
11	B2M	NM_004048.2	26-125	CGGGCATTCCTGAAGCTGACAGCATTCGGGCCGAGATGTCTCGCTCCGTGGCCTTAGCTGTGCTCGCGCTACTCTCTCTTTCTGGCCTGGAGGCTATCCA
12	BAD	NM_004322.3	964-1063	AGGGAGGGCTGACCCAGATTCCCTTCCGGTGCGTGTGAAGCCACGGAAGGCTTGGTCCCATCGGAAGTTTTGGGTTTTCCGCCCACAGCCGCCGGAAGTG
13	BAG2	NM_004282.3	786-885	AAGAGTCATTTAATGTCGCTCTACAGTGCATGTTCATCTGAGGTGCCACATGGGCCAGTTGATCAGAAGTTTCAATCCATAGTAATTGGCTGTGCTCTTG
14	BANF1	NM_001143985.1	553-652	GGAGGAAAGGGGTTTTGACAAGGCCTATGTTGTCCTTGGCCAGTTTCTGGTGCTAAAGAAAGATGAAGACCTCTTCCGGGAATGGCTGAAAGACACTTGT
15	BAX	NM_138761.3	343-442	TTTTTCCGAGTGGCAGCTGACATGTTTTCTGACGGCAACTTCAACTGGGGCCGGGTTGTCGCCCTTTTCTACTTTGCCAGCAAACTGGTGCTCAAGGCCC
16	BCL2	NM_000657.2	6-105	GTGAAGCAGAAGTCTGGGAATCGATCTGGAAATCCTCCTAATTTTTACTCCCTCTCCCCGCGACTCCTGATTCATTGGGAAGTTTCAAATCAGCTATAAC
17	BHMT	NM_001713.2	41-140	CGCAGCGGGAAGGCTCGCCTAGTCGGTCCGCATCCGTGTCGACCACCTGTCTGGACACCACGAAGATGCCACCCGTTGGGGGCAAAAAGGCCAAGAAGGG
18	BNIP3	NM_004052.2	585-684	AGGGGGCATATTCTCTGCAGAATTTCTGAAAGTTTTCCTTCCATCTCTGCTGCTCTCTCATTTGCTGGCCATCGGATTGGGGATCTATATTGGAAGGCGT
19	BTRC	NM_033637.2	1912-2011	ACACCTACATCTCCAGATAAATAACCATACACTGACCTCATACTTGCCCAGGACCCATTAAAGTTGCGGTATTTAACGTATCTGCCAATACCAGGATGAG
20	CASP3	NM_032991.2	686-785	ACTCCACAGCACCTGGTTATTATTCTTGGCGAAATTCAAAGGATGGCTCCTGGTTCATCCAGTCGCTTTGTGCCATGCTGAAACAGTATGCCGACAAGCT
21	CASP8	NM_001228.4	302-401	AGATGGACTTCAGCAGAAATCTTTATGATATTGGGGAACAACTGGACAGTGAAGATCTGGCCTCCCTCAAGTTCCTGAGCCTGGACTACATTCCGCAAAG
22	CAT	NM_001752.2	1131-1230	ATGCTTCAGGGCCGCCTTTTTGCCTATCCTGACACTCACCGCCATCGCCTGGGACCCAATTATCTTCATATACCTGTGAACTGTCCCTACCGTGCTCGAG
23	CBS	NM_000071.2	589-688	GCGGGAGCGTGAAGGACCGCATCAGCCTGCGGATGATTGAGGATGCTGAGCGCGACGGGACGCTGAAGCCCGGGGACACGATTATCGAGCCGACATCCGG
24	CBX5	NM_012117.1	636-735	TATGAAGAGAGACTGACATGGCATGCATATCCTGAGGATGCGGAAAACAAAGAGAAAGAAACAGCAAAGAGCTAAAGGAGGGGATGGTCTCTGTCATTTC
25	CCL2	NM_002982.3	1-100	GAGGAACCGAGAGGCTGAGACTAACCCAGAAACATCCAATTCTCAAACTGAAGCTCGCACTCTCGCCTCCAGCATGAAAGTCTCTGCCGCCCTTCTGTGC
26	CCL3	NM_002983.2	682-781	CTGTGTAGGCAGTCATGGCACCAAAGCCACCAGACTGACAAATGTGTATCGGATGCTTTTGTTCAGGGCTGTGATCGGCCTGGGGAAATAATAAAGATGC
27	CCL4	NM_002984.2	202-301	GAAGCTTCCTCGCAACTTTGTGGTAGATTACTATGAGACCAGCAGCCTCTGCTCCCAGCCAGCTGTGGTATTCCAAACCAAAAGAAGCAAGCAAGTCTGT
28	CCL5	NM_002985.2	281-380	AGTGTGTGCCAACCCAGAGAAGAAATGGGTTCGGGAGTACATCAACTCTTTGGAGATGAGCTAGGATGGAGAGTCCTTGAACCTGAACTTACACAAATTT
29	CCL8	NM_005623.2	690-789	AAGGAGAGATGGGTCAGGGATTCCATGAAGCATCTGGACCAAATATTTCAAAATCTGAAGCCATGAGCCTTCATACATGGACTGAGAGTCAGAGCTTGAA
30	CCNT1	NM_001240.2	1850-1949	GCACAAGACTCACCCATCTAATCATCATCATCATCATAATCACCACTCACACAAGCACTCTCATTCCCAACTTCCAGTTGGTACTGGGAACAAACGTCCT
31	CCR2	NM_001123041.2	744-843	TCTGATCTGCTTTTTCTTATTACTCTCCCATTGTGGGCTCACTCTGCTGCAAATGAGTGGGTCTTTGGGAATGCAATGTGCAAATTATTCACAGGGCTGT
32	CCR3	NM_001837.2	981-1080	CAGTGCTCTTTACCCAGAGGATACAGTATATAGCTGGAGGCATTTCCACACTCTGAGAATGACCATCTTCTGTCTCGTTCTCCCTCTGCTCGTTATGGCC
33	CCR4	NM_005508.4	673-772	TCCCTTCCTGGCTTTCTGTTCAGCACTTGTTATACTGAGCGCAACCATACCTACTGCAAAACCAAGTACTCTCTCAACTCCACGACGTGGAAGGTTCTCA
34	CCR5	NM_000579.1	2731-2830	TAGGAACATACTTCAGCTCACACATGAGATCTAGGTGAGGATTGATTACCTAGTAGTCATTTCATGGGTTGTTGGGAGGATTCTATGAGGCAACCACAGG
35	CCS	NM_005125.1	35-134	GGGTCCAGAATGGCTTCGGATTCGGGGAACCAGGGGACCCTCTGCACGTTGGAGTTCGCGGTGCAGATGACCTGTCAGAGCTGTGTGGACGCGGTGCGCA
36	CD209	NM_001144899.1	951-1050	TAGAGCTTGTTTTTCTGGCCCATCCTTGGAGCTTTATGAGTGAGCTGGTGTGGGATGCCTTTGGGGGTGGACTTGTGTTCCAAGAATCCACTCTCTCTTC
37	CD247	NM_198053.1	1491-1590	TGGCAGGACAGGAAAAACCCGTCAATGTACTAGGATACTGCTGCGTCATTACAGGGCACAGGCCATGGATGGAAAACGCTCTCTGCTCTGCTTTTTTTCT
38	CD4	NM_000616.4	976-1075	TGGCAGGCGGAGAGGGCTTCCTCCTCCAAGTCTTGGATCACCTTTGACCTGAAGAACAAGGAAGTGTCTGTAAAACGGGTTACCCAGGACCCTAAGCTCC
39	CD44	NM_001001392.1	430-529	ACACCATGGACAAGTTTTGGTGGCACGCAGCCTGGGGACTCTGCCTCGTGCCGCTGAGCCTGGCGCAGATCGATTTGAATATAACCTGCCGCTTTGCAGG
40	CD69	NM_001781.1	461-560	AGGACATGAACTTTCTAAAACGATACGCAGGTAGAGAGGAACACTGGGTTGGACTGAAAAAGGAACCTGGTCACCCATGGAAGTGGTCAAATGGCAAAGA
41	CD74	NM_001025159.1	965-1064	TTCAGCCCCCAGCCCCTCCCCCATCTCCCACCCTGTACCTCATCCCATGAGACCCTGGTGCCTGGCTCTTTCGTCACCCTTGGACAAGACAAACCAAGTC
42	CDK7	NM_001799.2	786-885	CTGAGGAACAGTGGCCGGACATGTGTAGTCTTCCAGATTATGTGACATTTAAGAGTTTCCCTGGAATACCTTTGCATCACATCTTCAGTGCAGCAGGAGA
43	CDK9	NM_001261.2	401-500	GGTGTTCGACTTCTGCGAGCATGACCTTGCTGGGCTGTTGAGCAATGTTTTGGTCAAGTTCACGCTGTCTGAGATCAAGAGGGTGATGCAGATGCTGCTT
44	CDKN1A	NM_000389.2	1976-2075	CATGTGTCCTGGTTCCCGTTTCTCCACCTAGACTGTAAACCTCTCGAGGGCAGGGACCACACCCTGTACTGTTCTGTGTCTTTCACAGCTCCTCCCACAA
45	CDO1	NM_001801.2	1423-1522	TGAATAATAGAGGAACTTACGGCACTCTGCCATTTGTTAATGAAAGGAAGTGCAGAGGATTTAGAAAAGTACATGATCCCCAGACCACAACAAACCAAAA
46	CEBPB	NM_005194.2	1421-1520	CAACCGCACATGCAGATGGGGCTCCCGCCCGTGGTGTTATTTAAAGAAGAAACGTCTATGTGTACAGATGAATGATAAACTCTCTGCTTCTCCCTCTGCC
47	COPS6	NM_006833.4	861-960	CAGATTTTTATGATCAATGCAACGACGTGGGGCTCATGGCCTACCTCGGCACCATCACCAAAACGTGCAACACCATGAACCAGTTTGTGAACAAGTTCAA
48	CR2	NM_001006658.1	486-585	GGTGTCAAGCAAATAATATGTGGGGGCCGACACGACTACCAACCTGTGTAAGTGTTTTCCCTCTCGAGTGTCCAGCACTTCCTATGATCCACAATGGACA
49	CSAD	NM_001244706.1	825-924	CTGCACTGACCTGTGCTGATATGGACTTCCTCCTCAACGAGCTGGAGCGGCTAGGCCAGGACCTGTGAGCCTTCTCTGTCTTGCTGCCGGCCTTGATACC
50	CTH	NM_001190463.1	861-960	CCTCTGCAATCGAGGTCTGAAGACTCTACATGTCCGAATGGAAAAGCATTTCAAAAACGGAATGGCAGTTGCCCAGTTCCTGGAATCTAATCCTTGGGTA
51	CX3CL1	NM_002996.3	1217-1316	CCCCGGAGCTGTGGTAGTAATTCATATGTCCTGGTGCCCGTGTGAACTCCTCTGGCCTGTGTCTAGTTGTTTGATTCAGACAGCTGCCTGGGATCCCTCA
52	CXCL12	NM_199168.3	70-169	CCGCCCGCCCGCCCGCCCGCGCCATGAACGCCAAGGTCGTGGTCGTGCTGGTCCTCGTGCTGACCGCGCTCTGCCTCAGCGACGGGAAGCCCGTCAGCCT
53	CXCL8	NM_000584.2	26-125	ACAGCAGAGCACACAAGCTTCTAGGACAAGAGCCAGGAAGAAACCACCGGAAGGAACCATCTCACTGTGTGTAAACATGACTTCCAAGCTGGCCGTGGCT
54	CXCR4	NM_003467.2	1336-1435	ATTGATGTGTGTCTAGGCAGGACCTGTGGCCAAGTTCTTAGTTGCTGTATGTCTCGTGGTAGGACTGTAGAAAAGGGAACTGAACATTCCAGAGCGTGTA
55	CYBB	NM_000397.3	2687-2786	TTTGAAGCATGAAAAAAGAGGGTTGGAGGTGGAGAATTAACCTCCTGCCATGACTCTGGCTCATCTAGTCCTGCTCCTTGTGCTATAAAATAAATGCAGA
56	CYGB	NM_134268.4	709-808	AAGCACAAGGTGGAACCGGTGTACTTCAAGATCCTCTCTGGGGTCATTCTGGAGGTGGTCGCCGAGGAATTTGCCAGTGACTTCCCACCTGAGACGCAGA
57	DHCR24	NM_014762.2	976-1075	CAGAGCCCAGCAAGCTGAATAGCATTGGCAATTACTACAAGCCGTGGTTCTTTAAGCATGTGGAGAACTATCTGAAGACAAACCGAGAGGGCCTGGAGTA
58	DUOX1	NM_175940.1	4856-4955	TGAGCCCACACCTCACCTCTGTTCTTCCTATTTCTGGCTGCCTCAGCCTTCTCTGATTTCCCACCTCCCAACCTTGTTCCAGGTGGCCATAGTCAGTCAC
59	DUOX2	NM_014080.4	3321-3420	AGGCACATCGTGTGTGTGGCAATCTTCTCGGCCATCTGTGTTGGCGTGTTTGCAGATCGTGCTTACTACTATGGCTTTGCCTCGCCACCCTCGGACATTG
60	DUSP1	NM_004417.2	988-1087	TCAAGAATGCTGGAGGAAGGGTGTTTGTCCACTGCCAGGCAGGCATTTCCCGGTCAGCCACCATCTGCCTTGCTTACCTTATGAGGACTAATCGAGTCAA
61	ELANE	NM_001972.2	196-295	ACTTCTGCGGCGCCACCCTGATTGCGCCCAACTTCGTCATGTCGGCCGCGCACTGCGTGGCGAATGTAAACGTCCGCGCGGTGCGGGTGGTCCTGGGAGC
62	EP300	NM_001429.2	716-815	CCAGCCAGGCCCAACAGAGCAGTCCTGGATTAGGTTTGATAAATAGCATGGTCAAAAGCCCAATGACACAGGCAGGCTTGACTTCTCCCAACATGGGGAT
63	EPHX2	NM_001979.5	421-520	AGGAAGTGCTCCGAGACCGCTAAAGTCTGCCTCCCCAAGAATTTCTCCATAAAAGAAATCTTTGACAAGGCGATTTCAGCCAGAAAGATCAACCGCCCCA
64	EPX	NM_000502.4	2061-2160	GACAGGTTCTGGTGGCAGAAACGAGGTGTTTTCACCAAAAGACAGCGCAAGGCCCTGAGCAGAATTTCCTTGTCTCGAATTATATGTGACAATACCGGTA
65	ETHE1	NM_014297.3	691-790	GAGGACTCTGAACCCTCGGCTCACCCTCAGCTGTGAGGAGTTTGTCAAAATCATGGGCAACCTGAACTTGCCTAAACCTCAGCAGATAGACTTTGCTGTT
66	FCAR	NM_002000.2	1416-1515	TGCTGAGATTATAGGCATGAGCCACCACGCCTGGCCAGATGCATGTTCAAACCAATCAAATGGTGTTTTCTTATGCAGGACTGATCGATTTGCACCCACC
67	FHL2	NM_001039492.2	249-348	CATTGCAACGAATCTCTCTTTGGCAAGAAGTACATCCTGCGGGAGGAGAGCCCCTACTGCGTGGTGTGCTTTGAGACCCTGTTCGCCAACACCTGCGAGG
68	FOS	NM_005252.2	1476-1575	ACTCAAGTCCTTACCTCTTCCGGAGATGTAGCAAAACGCATGGAGTGTGTATTGTTCCCAGTGACACTTCAGAGAGCTGGTAGTTAGTAGCATGTTGAGC
69	FOXM1	NM_202002.1	1001-1100	CAATTCGCCATCAACAGCACTGAGAGGAAGCGCATGACTTTGAAAGACATCTATACGTGGATTGAGGACCACTTTCCCTACTTTAAGCACATTGCCAAGC
70	FTH1	NM_002032.2	393-492	CCAAATACTTTCTTCACCAATCTCATGAGGAGAGGGAACATGCTGAGAAACTGATGAAGCTGCAGAACCAACGAGGTGGCCGAATCTTCCTTCAGGATAT
71	GADD45A	NM_001924.2	866-965	GTTACTCCCTACACTGATGCAAGGATTACAGAAACTGATGCCAAGGGGCTGAGTGAGTTCAACTACATGTTCTGGGGGCCCGGAGATAGATGACTTTGCA
72	GCLC	NM_001498.2	521-620	CTCAAGTGGGGCGATGAGGTGGAATACATGTTGGTATCTTTTGATCATGAAAATAAAAAAGTCCGGTTGGTCCTGTCTGGGGAGAAAGTTCTTGAAACTC
73	GCLM	NM_002061.2	600-699	TCATCATCAACTAGAAGTGCAGTTGACATGGCCTGTTCAGTCCTTGGAGTTGCACAGCTGGATTCTGTGATCATTGCTTCACCTCCTATTGAAGATGGAG
74	GGT1	NM_001032364.2	713-812	CATGAATGCCCACAGCATGGGCATCGGGGGTGGCCTCTTCCTCACCATCTACAACAGCACCACACGAAAAGCTGAGGTCATCAACGCCCGCGAGGTGGCC
75	GLA	NM_000169.2	981-1080	GCTGCTCCTTTATTCATGTCTAATGACCTCCGACACATCAGCCCTCAAGCCAAAGCTCTCCTTCAGGATAAGGACGTAATTGCCATCAATCAGGACCCCT
76	GNMT	NM_018960.4	716-815	GCTTGAGTAAGTTCCGGCTCTCCTACTACCCACACTGTCTGGCATCCTTCACGGAGCTGCTCCAAGCAGCCTTCGGAGGTAAGTGCCAGCACAGCGTCCT
77	GOT1	NM_002079.2	616-715	GTCCTCACCAACCTGGGAGAATCACAATGCTGTGTTTTCCGCTGCTGGTTTTAAAGACATTCGGTCCTATCGCTACTGGGATGCAGAGAAGAGAGGATTG
78	GOT2	NM_002080.2	2146-2245	GGAGAGTAGGAAACTGTACTTTATCTCGGCATCCTCTTGAATGATAGTGCAAGTTTCTCCAGTTGGGATGTTGTCTCTGCCCGGTTGGACCTCCTCCCTT
79	GPX1	NM_000581.2	746-845	GGTTTTCATCTATGAGGGTGTTTCCTCTAAACCTACGAGGGAGGAACACCTGATCTTACAGAAAATACCACCTCGAGATGGGTGCTGGTCCTGTTGATCC
80	GPX2	NM_002083.2	831-930	CCTCTGGTTGGTGATTCAACTTGGGCTCCAAGACTTGGGTAAGCTCTGGGCCTTCACAGAATGATGGCACCTTCCTAAACCCTCATGGGTGGTGTCTGAG
81	GPX3	NM_002084.3	1297-1396	GTCCAATTGTTCTGCTCTAACTGATACCTCAACCTTGGGGCCAGCATCTCCCACTGCCTCCAAATATTAGTAACTATGACTGACGTCCCCAGAAGTTTCT
82	GPX4	NM_001039847.1	436-535	CAGGGAGTAACGAAGAGATCAAAGAGTTCGCCGCGGGCTACAACGTCAAATTCGATATGTTCAGCAAGATCTGCGTGAACGGGGACGACGCCCACCCGCT
83	GPX5	NM_003996.3	886-985	CATCCTGAAGAACATTCCTAGACATTCTGACTCTTCCATCTCTCTCTACCCTGGAGGTGTAGAAATAGCAATGGGGTCACAGTCACACAATTTAGGTTCC
84	GSR	NM_000637.2	1526-1625	ATGCAGGGACTTGGGTGTGATGAAATGCTGCAGGGTTTTGCTGTTGCAGTGAAGATGGGAGCAACGAAGGCAGACTTTGACAACACAGTCGCCATTCACC
85	GSS	NM_000178.2	1511-1610	CAACCAGGCCACGGGACCTTCTATCCTCTGTATTTGTCATTCCTCTCCTAGCCCTCCTGAGGGGTATCCTCCTAAAGACCTCCAAAGTTTTTATGGAAGG
86	GSTP1	NM_000852.2	416-515	TTTTGAGACCCTGCTGTCCCAGAACCAGGGAGGCAAGACCTTCATTGTGGGAGACCAGATCTCCTTCGCTGACTACAACCTGCTGGACTTGCTGCTGATC
87	GSTZ1	NM_145871.2	1096-1195	CGTAACACCACGGGGAAGGCTGTGTGCCTTTTCTCATCCGCTTTTGTTGTGTGTGACTCCAAAGAATGCCCGCGCTGAAATTTGGCGTGAATTAAACTGA
88	GUSB	NM_000181.3	1900-1999	CCGATTTCATGACTGAACAGTCACCGACGAGAGTGCTGGGGAATAAAAAGGGGATCTTCACTCGGCAGAGACAACCAAAAAGTGCAGCGTTCCTTTTGCG
89	HMOX1	NM_002133.1	1431-1530	TGTTGTTTTTATAGCAGGGTTGGGGTGGTTTTTGAGCCATGCGTGGGTGGGGAGGGAGGTGTTTAACGGCACTGTGGCCTTGGTCTAACTTTTGTGTGAA
90	HPRT1	NM_000194.1	241-340	TGTGATGAAGGAGATGGGAGGCCATCACATTGTAGCCCTCTGTGTGCTCAAGGGGGGCTATAAATTCTTTGCTGACCTGCTGGATTACATCAAAGCACTG
91	HSP90AA1	NM_001017963.2	1656-1755	CTTGACCAATGACTGGGAAGATCACTTGGCAGTGAAGCATTTTTCAGTTGAAGGACAGTTGGAATTCAGAGCCCTTCTATTTGTCCCACGACGTGCTCCT
92	HSP90AB1	NM_007355.2	1881-1980	AGCCAATATGGAGCGGATCATGAAAGCCCAGGCACTTCGGGACAACTCCACCATGGGCTATATGATGGCCAAAAAGCACCTGGAGATCAACCCTGACCAC
93	HSPA1A	NM_005345.5	99-198	GCTTCCCAGAGCGAACCTGTGCGGCTGCAGGCACCGGCGCGTCGAGTTTCCGGCGTCCGGAAGGACCGAGCTCTTCTCGCGGATCCAGTGTTCCGTTTCC
94	HTATSF1	NM_014500.3	1091-1190	CTTTGATAGGCACCCAGATGGTGTGGCCTCTGTGTCCTTTCGGGATCCAGAGGAAGCTGATTATTGTATTCAGACTCTCGATGGAAGATGGTTTGGTGGC
95	IFNA1	NM_024013.1	586-685	ATCCCTCTCTTTATCAACAAACTTGCAAGAAAGATTAAGGAGGAAGGAATAACATCTGGTCCAACATGAAAACAATTCTTATTGACTCATACACCAGGTC
96	IFNB1	NM_002176.2	611-710	ACAGACTTACAGGTTACCTCCGAAACTGAAGATCTCCTAGCCTGTGCCTCTGGGACTGGACAATTGCTTCAAGCATTCTTCAACCAGCAGATGCTGTTTA
97	IFNG	NM_000619.2	971-1070	ATACTATCCAGTTACTGCCGGTTTGAAAATATGCCTGCAATCTGAGCCAGTGCTTTAATGGCATGTCAGACAGAACTTGAATGTGTCAGGTGACCCTGAT
98	IL10	NM_000572.2	231-330	AAGGATCAGCTGGACAACTTGTTGTTAAAGGAGTCCTTGCTGGAGGACTTTAAGGGTTACCTGGGTTGCCAAGCCTTGTCTGAGATGATCCAGTTTTACC
99	IL12B	NM_002187.2	1436-1535	GCAAGGCTGCAAGTACATCAGTTTTATGACAATCAGGAAGAATGCAGTGTTCTGATACCAGTGCCATCATACACTTGTGATGGATGGGAACGCAAGAGAT
100	IL16	NM_001172128.1	3281-3380	TCCTGTGAGACGAAGCTACTTGACGAAAAGACCAGCAAACTCTATTCTATCAGCAGCCAAGTGTCATCGGCTGTCATGAAATCCTTGCTGTGCCTTCCAT
101	IL1B	NM_000576.2	841-940	GGGACCAAAGGCGGCCAGGATATAACTGACTTCACCATGCAATTTGTGTCTTCCTAAAGAGAGCTGTACCCAGAGAGTCCTGTGCTGAATGTGGACTCAA
102	IL2	NM_000586.2	301-400	AGGATGCAACTCCTGTCTTGCATTGCACTAAGTCTTGCACTTGTCACAAACAGTGCACCTACTTCAAGTTCTACAAAGAAAACACAGCTACAACTGGAGC
103	IRF1	NM_002198.1	511-610	CTGTGCGAGTGTACCGGATGCTTCCACCTCTCACCAAGAACCAGAGAAAAGAAAGAAAGTCGAAGTCCAGCCGAGATGCTAAGAGCAAGGCCAAGAGGAA
104	IRF2	NM_002199.3	1625-1724	AGGCAGCACTAGCGACATTGCAGTCTGCTTCTGCACCTTATCTTAAAGCACTTACAGATAGGCCTTCTTGTGATCTTGCTCTATCTCACAGCACACTCAG
105	KLRD1	NM_002262.3	597-696	CAATTTTACTGGATTGGACTCTCTTACAGTGAGGAGCACACCGCCTGGTTGTGGGAGAATGGCTCTGCACTCTCCCAGTATCTATTTCCATCATTTGAAA
106	KRT1	NM_006121.2	691-790	TGCAGCAGGTAGATACCTCCACTAGAACCCATAATTTAGAGCCCTACTTTGAGTCATTCATCAACAATCTCCGAAGGAGAGTGGACCAACTGAAGAGTGA
107	LDHA	NM_001165414.1	1691-1790	AACTTCCTGGCTCCTTCACTGAACATGCCTAGTCCAACATTTTTTCCCAGTGAGTCACATCCTGGGATCCAGTGTATAAATCCAATATCATGTCTTGTGC
108	LHPP	NM_022126.3	382-481	ACCATACCTGCTCATCCATGACGGAGTCCGCTCAGAATTTGATCAGATCGACACATCCAACCCAAACTGTGTGGTAATTGCAGACGCAGGAGAAAGCTTT
109	LPO	NM_001160102.1	1613-1712	CTGCTGGCCAAGAAATCCAAGCTGATGAAACAGAATAAAATGATGACTGGAGAGCTGCGCAACAAGCTTTTCCAGCCAACTCACAGGATCCATGGCTTTG
110	LTBR	XM_006718983.2	681-780	GTGCTGCCTGGGCCCTCGAGTGTACACACTGCGAGCTACTTTCTGACTGCCCGCCTGGCACTGAAGCCGAGCTCAAAGATGAAGTTGGGAAGGGTAACAA
111	MAP3K5	NM_005923.3	2416-2515	TTTAGGAAAAGGCACTTATGGGATAGTCTACGCAGGTCGGGACTTGAGCAACCAAGTCAGAATTGCTATTAAGGAAATCCCAGAGAGAGACAGCAGATAC
112	MAT1A	NM_000429.2	2276-2375	GGGGATTAACCCACTAGCTCTTGTTGAGCCGTGGGCAATTGTCTGAAAAGTGAAGACAGAACCACAGGGCTATTTTGTTTGCTTCATGTGTCCCAGAAGA
113	MAT2A	NM_005911.4	806-905	AAGCAGTTGTGCCTGCGAAATACCTTGATGAGGATACAATCTACCACCTACAGCCAAGTGGCAGATTTGTTATTGGTGGGCCTCAGGGTGATGCTGGTTT
114	MB	NM_005368.2	587-686	CAAGAGAGAGCGGGGTCTGATCTCGTGTAGCCATATAGAGTTTGCTTCTGAGTGTCTGCTTTGTTTAGTAGAGGTGGGCAGGAGGAGCTGAGGGGCTGGG
115	MBL2	NM_000242.2	1757-1856	TGGACTTGTCTTTTGGTGGACATGGTGCACTAATTTCACTACCTATCCAGGAGTGGAACTGGTAGAGGATGAGGAAAGCATGTATTCAGCTTTAGTAGAT
116	MPO	NM_000250.1	546-645	AGACCTGCTGGAGAGGAAGCTGCGGTCCCTGTGGCGAAGGCCATTCAATGTCACTGATGTGCTGACGCCCGCCCAGCTGAATGTGTTGTCCAAGTCAAGC
117	MPST	NM_001013436.1	265-364	CGCGACGCGCGACGCGAGTTCGAGGAGCGCCACATCCCGGGCGCCGCTTTCTTCGACATCGACCAGTGCAGCGACCGCACCTCGCCCTACGACCACATGC
118	MPV17	NM_002437.4	261-360	TGGTACAAGGTTTTGGATCGGTTCATCCCTGGCACCACCAAAGTGGATGCACTGAAGAAGATGTTGTTGGATCAGGGGGGCTTTGCCCCGTGTTTTCTAG
119	MSRA	NM_001135670.2	473-572	TGCAGAAGTCGTCCGAGTGGTGTACCAGCCAGAACACATGAGTTTTGAGGAACTGCTCAAGGTCTTCTGGGAGAATCACGACCCGACCCAAGGTATGCGC
120	MT3	NM_005954.2	166-265	CACTAGCCAAGCCGCGCGTCCAGTTGCTTGGAGAAGCCCGTTCACCGCCTCCAGCTGCTGCTCTCCTCGACATGGACCCTGAGACCTGCCCCTGCCCTTC
121	MTR	NM_000254.2	6817-6916	TGAGTGAACTACAGCTATACCTCACAATAAGAATGAATCTCAGAAAATATTAAGGAAAAAAGCAAGTTTGAAGAGACCACATGGGGCGTACTATTTTTAT
122	NCF1	NM_000265.4	375-474	TGAGCCTGCCCACCAAGATCTCCCGCTGTCCCCACCTCCTCGACTTCTTCAAGGTGCGCCCTGATGACCTCAAGCTCCCCACGGACAACCAGACAAAAAA
123	NCF2	NM_000433.3	1005-1104	GCTCACCGTGTGCTATTTGGGTTTGTGCCTGAGACAAAAGAAGAGCTCCAGGTCATGCCAGGGAACATTGTCTTTGTCTTGAAGAAGGGCAATGATAACT
124	NCOA7	NM_181782.3	3076-3175	TCAGGATCTGGAGGTGTGGGCATTTGATTGAAATTCAGACTGCCTTAAAATATAACATTAAAAAGACTGGGTTCGATCAGCCCTCCTAAAGCTGGCTGGA
125	NFATC1	NM_172389.1	1985-2084	CGAATTCTCTGGTGGTTGAGATCCCGCCATTTCGGAATCAGAGGATAACCAGCCCCGTTCACGTCAGTTTCTACGTCTGCAACGGGAAGAGAAAGCGAAG
126	NFKBIA	NM_020529.1	946-1045	GGATGAGGAGAGCTATGACACAGAGTCAGAGTTCACGGAGTTCACAGAGGACGAGCTGCCCTATGATGACTGTGTGTTTGGAGGCCAGCGTCTGACGTTA
127	NOS2	NM_000625.4	1006-1105	CCCCAGCGGAGTGATGGCAAGCACGACTTCCGGGTGTGGAATGCTCAGCTCATCCGCTATGCTGGCTACCAGATGCCAGATGGCAGCATCAGAGGGGACC
128	NOX4	NM_001143836.2	1796-1895	ATAGCAAAATATAACAGAGGAAAAACAGTTGGTGTTTTCTGTTGTGGACCCAATTCACTATCCAAGACTCTTCATAAACTGAGTAACCAGAACAACTCAT
129	NOX5	NM_024505.2	2136-2235	AGCTCCATAAGGTGGACTTTATCTGGATCAACAGAGACCAGCGGTCTTTCGAGTGGTTTGTGAGCCTGCTGACTAAACTGGAGATGGACCAGGCCGAGGA
130	NQO1	NM_000903.2	791-890	CCGAATTCAAATCCTGGAAGGATGGAAGAAACGCCTGGAGAATATTTGGGATGAGACACCACTGTATTTTGCTCCAAGCAGCCTCTTTGACCTAAACTTC
131	NUDT1	NM_002452.3	394-493	TGTGGCCCGACGACAGCTACTGGTTTCCACTCCTGCTTCAGAAGAAGAAATTCCACGGGTACTTCAAGTTCCAGGGTCAGGACACCATCCTGGACTACAC
132	PDLIM1	NM_020992.2	796-895	GGATCCCAACAAGCCCTCAGGATTCAGAAGTGTTAAAGCTCCTGTCACTAAAGTGGCTGCGTCGATTGGAAATGCTCAGAAGTTGCCTATGTGTGACAAA
133	POLR1B	NM_019014.3	3321-3420	GGAGAACTCGGCCTTAGAATACTTTGGTGAGATGTTAAAGGCTGCTGGCTACAATTTCTATGGCACCGAGAGGTTATATAGTGGCATCAGTGGGCTAGAA
134	PPIA	NM_021130.2	926-1025	GGAATATTGAAAATGTAGGCAGCAACTGGGCATGGTGGCTCACTGTCTGTAATGTATTACCTGAGGCAGAAGACCACCT
135	PRDX1	NM_002574.2	633-732	GACCCATGAACATTCCTTTGGTATCAGACCCGAAGCGCACCATTGCTCAGGATTATGGGGTCTTAAAGGCTGATGAAGGCATCTCGTTCAGGGGCCTTTT
136	PRDX2	NM_181738.1	240-339	GTCGGACTACAAAGGGAAGTACGTGGTCCTCTTTTTCTACCCTCTGGACTTCACTTTTGTGTGCCCCACCGAGATCATCGCGTTCAGCAACCGTGCAGAG
137	PRDX3	NM_014098.3	964-1063	CATGGTTAGTTGCTAGTACAAGGAATCCTTTATTGGTAACATCTTGGTGGCTGGCTAGCTAGTTTCTACAGAACATAATTTGCCTCTATAGAAGGCTATT
138	PRDX4	NM_006406.1	541-640	AGGAGGACTTGGGCCAATAAGGATTCCACTTCTTTCAGATTTGACCCATCAGATCTCAAAGGACTATGGTGTATACCTAGAGGACTCAGGCCACACTCTT
139	PRDX5	NM_012094.4	601-700	GGAAGGAGACAGACTTATTACTAGATGATTCGCTGGTGTCCATCTTTGGGAATCGACGTCTCAAGAGGTTCTCCATGGTGGTACAGGATGGCATAGTGAA
140	PRDX6	NM_004905.2	1391-1490	GTGATAAGTTTCTATCAAAATGGGGAGATTGCAGAAAAGGCTTCCCTTGGCTCCCAAGGAGGTGTAGCAGGTGTGAGCAATATTAGTGCCATGTGCCTTT
141	PRNP	NM_000311.3	1681-1780	GCATGAGCTCTGTGTGTACCGAGAACTGGGGTGATGTTTTACTTTTCACAGTATGGGCTACACAGCAGCTGTTCAACAAGAGTAAATATTGTCACAACAC
142	PTGR1	NM_001146109.1	908-1007	TGATAATGTAGGTGGAGAGTTTTCAAACACTGTTATCGGCCAGATGAAGAAATTTGGAAGGATTGCCATATGTGGAGCCATCTCTACATATAACAGAACC
143	PTGS1	NM_000962.2	701-800	ACCCCCAAGGCACCAACCTCATGTTTGCCTTCTTTGCACAACACTTCACCCACCAGTTCTTCAAAACTTCTGGCAAGATGGGTCCTGGCTTCACCAAGGC
144	PTGS2	NM_000963.1	496-595	GCTACAAAAGCTGGGAAGCCTTCTCTAACCTCTCCTATTATACTAGAGCCCTTCCTCCTGTGCCTGATGATTGCCCGACTCCCTTGGGTGTCAAAGGTAA
145	PTK2B	NM_004103.3	736-835	CCAGTAGATGTGGAAAAGGAGGACGTGCGTATCCTCAAGGTCTGCTTCTATAGCAACAGCTTCAATCCTGGGAAAAACTTCAAACTGGTCAAATGCACTG
146	RBL2	NM_005611.3	1311-1410	GAATCTCCACACCACTAACTGGTGTTAGGTACATTAAGGAGAATAGCCCTTGTGTGACTCCAGTTTCTACAGCTACGCATAGCTTGAGTCGTCTTCACAC
147	RNF7	NM_014245.2	506-605	TTCAGAGCCCTGGTGGATCTTGTAATCCAGTGCCCTACAAAGGCTAGAACACTACAGGGGATGAATTCTTCAAATAGGAGCCGATGGATCTGTGGTCCTT
148	RPLP0	NM_001002.3	251-350	CGAAATGTTTCATTGTGGGAGCAGACAATGTGGGCTCCAAGCAGATGCAGCAGATCCGCATGTCCCTTCGCGGGAAGGCTGTGGTGCTGATGGGCAAGAA
149	SEPP1	NM_005410.2	201-300	GGAGCATAAGAGATCAAGATCCAATGCTAAACTCCAATGGTTCAGTGACTGTGGTTGCTCTTCTTCAAGCCAGCTGATACCTGTGCATACTGCAGGCATC
150	VIMP	NM_203472.1	467-566	GAAATGCAAAGAAGCCCCAGGAGGAAGACAGTCCTGGGCCTTCCACTTCATCTGTCCTGAAACGGAAATCGGACAGAAAGCCTTTGCGGGGAGGAGGTTA
151	SELL	NR_029467.1	1586-1685	CTAACTCCAGTGAAGTAATGGGGTCCTGCTCAAGTTGAAAGAGTCCTATTTGCACTGTAGCCTCGCCGTCTGTGAATTGGACCATCCTATTTAACTGGCT
152	SERPINA1	NM_000295.4	761-860	TCACTGTCAACTTCGGGGACACCGAAGAGGCCAAGAAACAGATCAACGATTACGTGGAGAAGGGTACTCAAGGGAAAATTGTGGATTTGGTCAAGGAGCT
153	SERPINC1	NM_000488.3	1420-1519	TCAAGGCCAACAGGCCTTTCCTGGTTTTTATAAGAGAAGTTCCTCTGAACACTATTATCTTCATGGGCAGAGTAGCCAACCCTTGTGTTAAGTAAAATGT
154	SFTPD	NM_003019.4	696-795	AAAGTGGGCTTCCAGATGTTGCTTCTCTGAGGCAGCAGGTTGAGGCCTTACAGGGACAAGTACAGCACCTCCAGGCTGCTTTCTCTCAGTATAAGAAAGT
155	SIRT2	NM_012237.3	611-710	CTATGACAACCTAGAGAAGTACCATCTTCCCTACCCAGAGGCCATCTTTGAGATCAGCTATTTCAAGAAACATCCGGAACCCTTCTTCGCCCTCGCCAAG
156	SLC7A11	NM_014331.3	637-736	TCCATTACCAGCTTTTGTACGAGTCTGGGTGGAACTCCTCATAATACGCCCTGCAGCTACTGCTGTGATATCCCTGGCATTTGGACGCTACATTCTGGAA
157	SLPI	NM_003064.2	331-430	TTTCTGTGAGATGGATGGCCAGTGCAAGCGTGACTTGAAGTGTTGCATGGGCATGTGTGGGAAATCCTGCGTTTCCCCTGTGAAAGCTTGATTCCTGCCA
158	SMARCB1	NM_003073.3	1061-1160	AGAAGGAGAACTCACCAGAGAAGTTTGCCCTGAAGCTGTGCTCGGAGCTGGGGTTGGGCGGGGAGTTTGTCACCACCATCGCATACAGCATCCGGGGACA
159	SOD1	NM_000454.4	36-135	GCCTATAAAGTAGTCGCGGAGACGGGGTGCTGGTTTGCGTCGTAGTCTCCTGCAGCGTCTGGGGTTTCCGTTGCAGTCCTCGGAACCAGGACCTCGGCGT
160	SOD2	NM_000636.2	202-301	TTTGGGGTATCTGGGCTCCAGGCAGAAGCACAGCCTCCCCGACCTGCCCTACGACTACGGCGCCCTGGAACCTCACATCAACGCGCAGATCATGCAGCTG
161	SOD3	NM_003102.2	140-239	GGTGCAGCTCTCTTTTCAGGAGAGAAAGCTCTCTTGGAGGAGCTGGAAAGGTGCCCGACTCCAGCCATGCTGGCGCTACTGTGTTCCTGCCTGCTCCTGG
162	SPINK1	NM_003122.2	66-165	GACGTGGTAAGTGCGGTGCAGTTTTCAACTGACCTCTGGACGCAGAACTTCAGCCATGAAGGTAACAGGCATCTTTCTTCTCAGTGCCTTGGCCCTGTTG
163	SQRDL	NM_021199.2	1521-1620	AAAGAGTTCCTTGATGGGTAATGGTGACCAAATGCCTCCCTTTTCAGTACCTTTGAACAGCAACCATGTGGGCTACTCATGATGGGCTTGATTCTTTGGG
164	SQSTM1	NM_003900.3	1446-1545	GGGCCAGTTTCTCTGCCTTCTTCCAGGATCAGGGGTTAGGGTGCAAGAAGCCATTTAGGGCAGCAAAACAAGTGACATGAAGGGAGGGTCCCTGTGTGTG
165	SRXN1	NM_080725.1	1656-1755	AAGAGAGTGAGAGTAGAAGCTGAAAGACTTCTTGAGTTCTTGGCCTGGAACTGGGACTAGGACAGTGTCACTTCTGCTAAGTTCTTTTGGTCAGAGCAAA
166	STAT1	NM_139266.1	456-555	ACAGTGGTTAGAAAAGCAAGACTGGGAGCACGCTGCCAATGATGTTTCATTTGCCACCATCCGTTTTCATGACCTCCTGTCACAGCTGGATGATCAATAT
167	STAT3	NM_003150.3	2061-2160	AAAGAAGGAGGCGTCACTTTCACTTGGGTGGAGAAGGACATCAGCGGTAAGACCCAGATCCAGTCCGTGGAACCATACACAAAGCAGCAGCTGAACAACA
168	SUOX	NM_000456.2	1516-1615	GGCGGGATTACAAAGGCTTCTCTCCATCTGTGGACTGGGAGACTGTAGATTTTGACTCTGCTCCATCCATTCAGGAACTTCCTGTCCAGTCGGCCATCAC
169	TGFB1	NM_000660.3	1261-1360	TATATGTTCTTCAACACATCAGAGCTCCGAGAAGCGGTACCTGAACCCGTGTTGCTCTCCCGGGCAGAGCTGCGTCTGCTGAGGCTCAAGTTAAAAGTGG
170	TNF	NM_000594.2	1011-1110	AGCAACAAGACCACCACTTCGAAACCTGGGATTCAGGAATGTGTGGCCTGCACAGTGAAGTGCTGGCAACCACTAAGAATTCAAACTGGGGCCTCCAGAA
171	TNFRSF1B	NM_001066.2	836-935	CCCAGCTGAAGGGAGCACTGGCGACTTCGCTCTTCCAGTTGGACTGATTGTGGGTGTGACAGCCTTGGGTCTACTAATAATAGGAGTGGTGAACTGTGTC
172	TNFSF10	NM_003810.2	116-215	GGGGGGACCCAGCCTGGGACAGACCTGCGTGCTGATCGTGATCTTCACAGTGCTCCTGCAGTCTCTCTGTGTGGCTGTAACTTACGTGTACTTTACCAAC
173	TPO	NM_175719.3	297-396	CTCCAGCTCAGCTTCTGTCTTTTTCCAAACTTCCTGAGCCAACAAGCGGAGTGATTGCCCGAGCAGCAGAGATAATGGAAACATCAATACAAGCGATGAA
174	TRAPPC6A	NM_001270891.1	403-502	CCTGCGCGGCGCCCTCTATACCCTGGGCATTGAGAGCGTGGTCACCGCCTCCGTGGCAGCCCTGCCCGTCTGTAAGTTCCAGGTGGTGATTCCGAAATCC
175	TRIM5	NM_033092.2	801-900	GAAAGCTTCCTGGAAGACTCAAATACAGTATGACAAAACCAACGTCTTGGCAGATTTTGAGCAACTGAGAGACATCCTGGACTGGGAGGAGAGCAATGAG
176	TST	NM_001270483.1	1007-1106	CCTCTTAGGTGAAGGAGATGACATGTTTTTAGAATTGCTGTGCAAGGCTCACCCTCTCTCTGTCAACACTGGAATAAACTTTGCCTTTTCTGAGTAGTGA
177	TTN	NM_001256850.1	34831-34930	GTGCCTGAGGCTCCCAAAGAAGTTGTTCCTGAAAAGAAAGTGCCAGTGCCTCCTCCTAAAAAGCCTGAAGTGCCACCCACAAAAGTCCCAGAGGTGCCAA
178	TXN	NM_003329.2	56-155	CAGCCAAGATGGTGAAGCAGATCGAGAGCAAGACTGCTTTTCAGGAAGCCTTGGACGCTGCAGGTGATAAACTTGTAGTAGTTGACTTCTCAGCCACGTG
179	TXNRD1	NM_001093771.1	1010-1109	AGTGATGATCTTTTCTCCTTGCCTTACTGCCCGGGTAAGACCCTGGTTGTTGGAGCATCCTATGTCGCTTTGGAGTGCGCTGGATTTCTTGCTGGTATTG
180	TXNRD2	NM_006440.3	496-595	TTTAACATCAAAGCCAGCTTTGTTGACGAGCACACGGTTTGCGGCGTTGCCAAAGGTGGGAAAGAGATTCTGCTGTCAGCCGATCACATCATCATTGCTA
181	UCP2	NM_003355.2	101-200	CTGCCGTGTTCTCCCTGCGGCTCGGACACATAGTATGACCATTAGGTGTTTCGTCTCCCACCCATTTTCTATGGAAAACCAAGGGGATCGGGCCATGATA
182	VPS4A	NM_013245.2	1941-2040	CAAGCTCTGCCTCAAAGACCGAGTGACATAAGCCATTCCCACCCTCCTAGGTTCACATCCAGGGCTGTGTCTTCCTTGGGGGAGGAGATGGTGTCGTTTA
183	XCL1	NM_002995.2	267-366	CCTCACTACCCAGCGACTGCCGGTTAGCAGAATCAAGACCTACACCATCACGGAAGGCTCCTTGAGAGCAGTAATTTTTATTACCAAACGTGGCCTAAAA
184	XPO1	NM_003400.3	3641-3740	AATCTTTCTTCAGGAATATGTGGCTAATCTCCTTAAGTCGGCCTTCCCTCACCTACAAGATGCTCAAGTAAAGCTCTTTGTGACAGGGCTTTTCAGCTTA
185	YY1	NM_003403.3	1119-1218	GACCCTGGAGGGCGAGTTCTCGGTCACCATGTGGTCCTCAGATGAAAAAAAAGATATTGACCATGAGACAGTGGTTGAAGAACAGATCATTGGAGAGAAC

## Sheet: Supplementary File 1c
Supplementary File 1c. List of differentially expressed genes from NanoString nCounter Gene Expression analysis for U1-shNT, shCTH, shNT+PMA and shCTH+PMA samples.
Gene Name	shNT	shNT	shCTH	shCTH	shNT+PMA	shNT+PMA	shCTH+PMA	shCTH+PMA
AHCY	6800.61	6798.82	3007.09	3079.2	1541.84	1618.61	804.5	860.85
APOBEC3G	234.38	201	108.63	90.2	198.53	187.99	104.49	113
ATOX1	2007	1951.48	1489.12	1382.74	895.87	941	675.16	735.96
BAG2	699.43	740.18	499.9	483.13	178.78	223.11	152.72	167.26
BANF1	3394.76	3101.1	2070.74	1902.73	1205.03	1173.42	780.38	832.61
BAX	3677.24	3480.76	1997.68	1939.6	2444.62	2646.38	1357.63	1471.93
BNIP3	1022.62	969.89	7734.99	7048.59	522.51	467.92	5217.17	4695.3
BTRC	462.58	458.36	280.71	292.55	327.93	341.9	189.98	197
CASP3	1773.86	1800.47	1415.1	1273.72	1021.31	1054.63	827.15	832.61
CAT	11705.2	11386.7	6447.75	6002.32	1934.96	1907.83	1090.93	1128.48
CBX5	2396.81	2510.87	1287.24	1253.33	974.89	1005.05	558.98	523.35
CCNT1	1375.42	1209.17	823.87	795.29	802.03	790.2	430.38	470.57
CCS	414.48	363.71	283.6	267.45	277.55	319.18	189.25	180.65
CD44	2578.14	2314.13	1581.41	1450.97	2638.22	2492.47	1390.51	1492.74
CD69	165.3	135.06	325.9	338.82	233.1	249.97	210.44	219.3
CD74	1794.83	1626.06	1086.32	967.84	906.73	887.29	507.83	544.91
CDK9	689.56	611.5	461.45	457.25	407.93	426.6	251.36	266.14
COPS6	10065.8	9760.6	7308.15	6926.23	5343.6	5275.2	3573.83	3540.06
CXCL8	592.11	505.15	8366.59	8854.85	12612.3	12636.9	9282.76	8908.13
DHCR24	527.96	496.64	1047.87	1106.66	396.08	379.09	645.2	637.09
FHL2	176.4	178.66	129.78	138.04	166.93	171.47	74.53	83.26
GADD45A	189.97	173.35	330.7	330.98	73.09	71.27	65.76	73.6
GCLC	1615.96	1501.63	825.8	839.21	1225.77	1263.28	938.21	918.1
GCLM	1486.44	1451.65	1045.94	1017.25	1027.24	1013.31	453.76	481.72
GGT1	378.7	352.01	191.31	164.7	179.77	174.57	94.99	86.98
GOT2	2367.2	2204.59	1317.04	1279.21	918.59	892.46	421.61	457.93
GPX4	8558.43	7968.64	4669.26	4564.68	7274.61	7450.57	4099.21	4332.52
GSR	3815.4	3477.57	2787.9	2797.63	2851.57	2673.24	2004.3	2227.22
GSS	948.61	847.59	610.45	583.53	405.96	448.29	319.31	356.83
GSTP1	33364.1	32080.9	18260.8	16725.4	8306.79	8218.04	4798.48	5133.9
HTATSF1	1079.36	1024.13	738.31	683.13	435.59	497.88	273.28	315.2
IRF2	843.75	776.34	472.98	465.1	904.76	854.24	554.6	556.06
LHPP	794.41	762.51	367.23	370.98	353.61	365.66	199.48	206.66
LTBR	767.27	713.59	462.41	417.25	559.05	569.15	283.51	321.89
MAP3K5	181.33	142.51	116.32	135.69	106.67	92.96	79.65	70.62
MAT2A	4873.79	3889.14	1902.5	1924.69	2268.81	2273.49	851.26	882.41
MPST	1873.78	1978.07	1003.64	1087.84	805.99	819.12	576.52	527.07
MPV17	1560.45	1525.03	1034.41	1008.62	915.62	913.12	740.2	734.48
MSRA	1390.22	1337.86	893.09	896.47	1120.08	1184.78	685.39	695.82
NUDT1	1611.03	1535.66	817.14	742.74	530.41	505.11	279.86	300.33
PRDX1	7352.01	7163.59	5674.82	5528.6	5215.2	5379.53	4369.56	4820.93
PRDX3	11113.1	10357.2	6808.25	6555.26	5538.19	5225.62	3347.32	3353.47
PRDX4	3350.35	3272.32	2406.25	2286.26	964.02	1014.34	831.53	872.01
PRDX5	4445.75	4316.66	3067.65	2908.22	2390.3	2459.42	1750.75	1813.89
PRDX6	3735.22	3587.11	2431.24	2299.59	1469.74	1525.65	1392.71	1487.54
SIRT2	1845.4	1779.2	1095.93	1036.07	1374.92	1362.44	959.4	893.56
SMARCB1	1532.08	1426.12	1213.22	1103.52	768.45	774.7	512.22	579.11
SOD1	321.96	363.71	226.88	214.9	186.68	198.32	151.25	171.72
SRXN1	967.11	944.37	543.16	519.21	926.49	859.4	439.15	459.42
STAT1	5331.44	4973.89	3300.3	3220.37	4678.86	4914.71	2753.99	2807.81
TST	3956.02	3622.21	1776.57	1690.97	1624.81	1631.01	930.91	950.06
TXN	21556.5	20985.6	12849.4	12049.3	13859.8	14206	8202.79	8715.59
TXNRD1	5689.18	5314.2	3246.46	3265.86	5325.82	5596.45	2686.04	2700.02
TXNRD2	891.86	893.32	574.88	563.92	466.21	471.02	303.97	288.44
UCP2	1350.75	1216.62	719.09	676.86	469.17	481.35	320.04	354.6
VPS4A	1090.47	1042.21	682.56	669.8	616.34	693.1	415.77	413.33
YY1	3268.93	3107.48	2516.8	2403.12	1877.67	1889.24	1402.21	1405.02

## Sheet: Supplementary File 1d
Supplementary File 1d. List of differentially expressed genes from NanoString nCounter Gene Expression analysis for U1 untreated, GYY4137, PMA and GYY4137+PMA treated samples.
Gene name	Untreated U1	Untreated U1	GYY4137	GYY4137	PMA	PMA	GYY4137+PMA	GYY4137+PMA
SLC7A11	155.21	164.96	1603.4	1227.34	791.24	593.89	5890.68	6221.89
SRXN1	480.44	511.08	1121.46	1220.36	718.73	614.32	2618.63	2663.93
VIMP	35.98	32.38	46.05	43.04	36.26	34.52	105.07	104.38
TXNRD1	3171.21	3258.42	4192.18	3911.2	3123.37	2865.17	7959.31	7667.31
GCLM	1189.47	1172.48	1850	1640.33	670.74	630.52	1773.11	1565.68
GCLC	737.95	696.86	974.12	823.65	933.07	806.64	1310.13	1316.08
FTH1	21411.1	20353	127359	102751	238446	221289	643243	631402
HMOX1	395.78	336.09	4481.75	3622.68	2674.43	2214.22	10581.2	11130
GSR	2162.35	2208.51	3238.52	3362.09	3398.49	3150.49	5964.56	6169.7
GPX4	5594.59	5173.24	5606.28	4895.39	4513.91	4165.66	7481.55	7810.26
DUSP1	47.97	40.86	77.77	51.19	246.33	176.83	577.9	599.04
PRDX1	6725.5	6387.34	3107.55	3285.31	7922	7614.85	4109.35	4440.64
PRDX3	6118.77	5924.83	3687.72	3491.23	3234.27	3194.87	1937.29	1765.36
PRDX5	2971.55	2990.94	2560.12	2715.27	1629.4	1596.38	1553.12	1477.19
PRDX6	2177.87	2149.16	1154.2	1151.72	1869.33	1651.33	981.78	1066.48
GPX1	1494.24	1239.54	1951.3	1676.39	1647.53	1423.07	620.59	710.23
PRNP	1113.27	1190.98	1645.35	1504.22	1259.37	1144.8	3058.62	2820.5
CCS	219.41	227.4	304.92	261.75	287.92	226.85	469.55	494.67
MSRA	816.26	825.59	862.58	795.73	893.61	778.46	1318.34	1347.85
UCP2	557.34	656.77	514.68	492.1	556.64	447.35	392.38	347.17
ATOX1	1116.8	1091.54	690.68	665.44	635.55	554.43	508.95	467.44
DHCR24	620.84	665.25	336.64	401.36	693.13	660.81	305.37	258.68
NOS2	12.16	12.48	25.58	17.45	36.26	33.11	59.1	52.19
CYBB	294.9	336.09	400.08	375.76	1066.36	929.22	630.44	739.73
NQO1	721.02	559.64	960.81	894.62	1336.15	1306.83	655.07	614.93
NCF1	222.94	285.99	168.83	235	9386.11	7471.84	1494.01	1275.24
CAT	6398.15	7127.37	8670.86	9332.43	1282.83	1146.91	1666.4	1747.21
GSTP1	16617.3	17221.8	10642.6	11077.5	6391.77	5419.66	3776.07	3982.28
BCL2	249.75	277.51	311.06	241.98	132.23	133.85	88.66	95.3
FHL2	132.63	137.98	35.81	36.06	121.57	90.17	57.46	56.73
CDKN1A	227.88	194.26	539.24	415.32	1884.26	1800.68	3524.88	3526.19
LTBR	506.55	504.14	718.31	631.7	545.98	414.24	751.93	782.84
SQSTM1	2445.96	2482.17	8485.65	7189.53	7390.95	6768.05	19671.7	20338
CTH	326.64	295.24	814.49	685.22	146.09	130.33	2426.54	2568.63
ETHE1	600.38	526.5	435.9	408.34	988.52	925	812.68	844.11
SQRDL	3696.1	4049.33	4393.75	4257.88	6131.58	5533.78	6852.75	7215.76
GOT1	152.39	152.63	181.11	141.93	122.63	115.54	366.11	310.87
GGT1	194.72	201.97	201.58	184.97	91.71	78.2	55.82	56.73
TST	1945.05	1955.67	855.42	844.6	772.05	712.95	467.9	510.55
CD74	745.71	813.26	473.76	437.42	426.54	419.17	147.76	201.95
SERPINA1	83.95	80.94	64.46	58.17	148.22	159.22	50.89	38.57
TGFB1	2386.7	2275.58	1671.96	1548.42	6333.12	5824.74	4152.04	4073.05
XPO1	7199.59	7061.85	6369.61	5794.67	4144.95	3745.78	6219.03	6423.84
APOBEC3G	84.66	98.67	79.81	60.49	85.31	100.04	50.89	59
CBX5	1276.24	1385.23	1079.51	952.79	704.86	643.2	778.2	839.57
PPIA	788.75	764.69	268.09	295.49	294.32	322.66	49.25	72.61
CD4	1326.33	1436.11	1016.07	1086.57	523.58	420.58	246.27	235.99
CXCR4	13544.1	13203.3	15015.9	13298.3	689.94	672.79	466.26	621.74
BTRC	255.39	255.15	316.18	273.39	255.93	225.44	495.81	458.36
PTK2B	1329.86	1517.82	1342.48	1134.27	1674.19	1270.9	3061.9	3331.05
FOS	349.93	386.2	463.52	369.95	1903.45	1568.2	1164.02	1064.21
NFKBIA	1055.42	901.91	1296.43	1012.12	2064.48	1982.44	2700.71	2843.19
STAT1	3422.36	3465.79	4003.9	3601.74	3464.61	3107.51	5342.32	5284.75
STAT3	565.1	560.41	985.37	882.99	621.69	555.14	1313.42	1377.35
IRF1	50.8	53.96	62.42	41.88	33.06	44.38	113.28	108.92
YY1	2330.96	2374.25	2490.54	2216.19	1533.43	1330.78	2190.12	2536.86

## Sheet: Supplementary File 1e
Supplementary File 1e. Characteristic of ART treated HIV-1 infected study participants
Sl. no.	Patient ID	Age	Sex	CD4 cell count (cells/mm3)	Viral load (copies/ml)	Date of Diagnosis	Date of start of ART	Data of sample collection
1	Subject A	32	F	555	5540	2015-07-02	2015-03-23	2016-08-16
2	Subject B	31	M	484	<34	2012-05-04	2015-06-23	2016-10-05
3	Subject C	34	F		Target not detected	2011-06-23	2015-01-08	2016-08-10
4	Subject D	25	F	642	Target not detected	2006-09-26	2006-10-16	2019-10-01
5	Subject E	40	M	351	Target not detected	2008-01-02	2008-12-01	2019-11-18

## Sheet: Supplementary File 1f
Supplementary File 1f. List of primers and probes
Host genes RT-qPCR primers
Primer	Sequence
FP CTH	TATTTACTCTGGCCGAGAGC
RP CTH	TCCTCTAAGCCCACAGAAAG
FP CBS	GCCTGAAGTGTGAGCTCTTG
RP CBS	CACGATGATGCAGCGATAGC
FP MPST	GCCGCTTTCTTCGACATC
RP MPST	TGGCGTCGTAGATCACG
FP p24	ATAATCCACCTATCCCAGTAGGAGAAAT
RP p24	TTGGTTCCTTGTCTTATGTCCAGAATGC
FP actin	ATGTGGCCGAGGACTTTGATT
RP actin	AGTGGGGTGGCTTTTAGGATG
FP B2M	GCCCAAGATAGTTAAGTGGGATCG
RP B2M	TCATCCAATCCAAATGCGGC
FP GCLC	GGCACAAGGACGTTCTCAAGT
RP GCLC	CAAGGGTAGGATGGTTTGGG
FP TXN	CCCTCTCTGAAAAGTATTCCAACG
RP TXN	TGGCTCCAGAAAATTCACCCA
FP TXNRD1	ATGGGCAATTTATTGGTCCTCAC
RP TXNRD1	CCCAAGTAACGTGGTCTTTCAC
FP HO1	TAGAAGAGGCCAAGACTGCG
RP HO1	GGGCAGAATCTTGCACTTTGTT
ChIP-qPCR
ER P1	TTTCCGCTGGGGACTTTC
ER P2	CCAGTACAGGCAAAAAGCAG
RBEI P1	GAGCCCTCAGATGCTAC
RBEI P2	CAGTGGGTTCCCTAGTTAGC
RBEIII P1	GACAGCCTCCTAGCATTTCG
RBEIII P2	CAGCGGAAAGTCCCTTGTAG
GAPDH FP	GGACCTGACCTGCCGTCTAGAA
GAPDH RP	GGTGTCGCTGTTGAAGTCAGAG
Total HIV DNA and RNA in primary cells
HIV L1	ATGCCACGTAAGCGAAACTCTGGGTCTCTCTAGTTAGAC
HIV R1	CCATCTCTCTCCTTCTAGC
HIV L2	ATGCCACGTAAGCGAAACT
HIV R2	CTGAGGGATCTCTAGTTACC
HIV Taq probe	FAM-CACTCAAGGCAAGCTTTATTGAGGC-NFQ
CD3OUT5	ACTGACATGGAACAGGGGAAG
CD3OUT3	CCAGCTCTGAAGTAGGGAACATAT
CD3IN5	GGCTATCATTCTTCTTCAAGGT
CD3IN3	CCTCTCTTCAGCCATTTAAGTA
CD3 Taq probe	FAM-AGCAGAGAACAGTTAAGAGCCTCCAT-NFQ
