# Supplementary figures and images for: Hydrogen sulfide blocks HIV rebound by maintaining mitochondrial bioenergetics and redox homeostasis
Source: eLife journal article supplement (doi:10.7554/elife.68487), 2021-11-18

# Figure 2-Figure supplement 1

**A.**

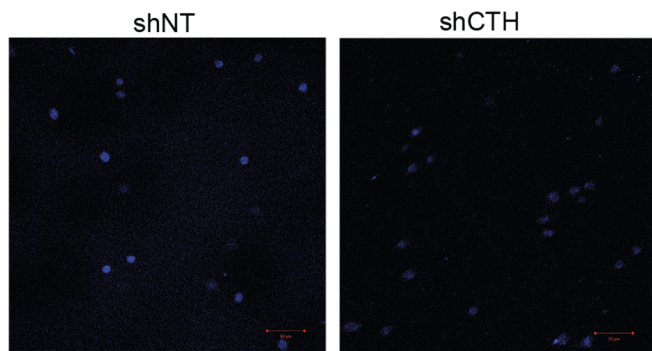

**B.**

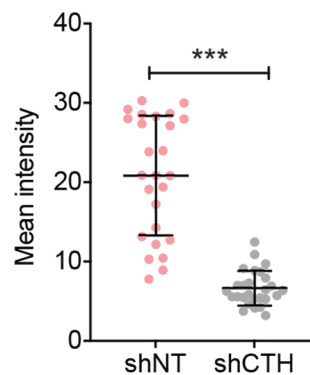

**C.**

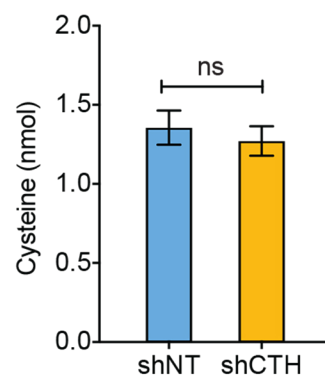

**D.**

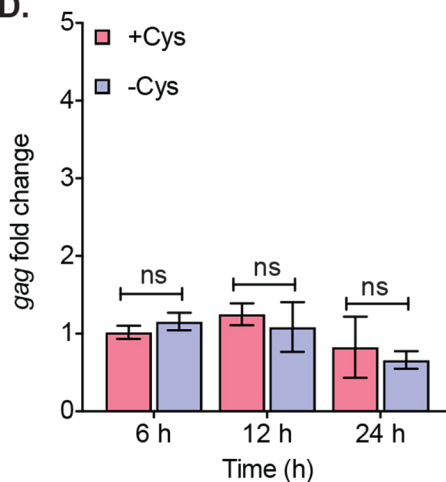

**E.**

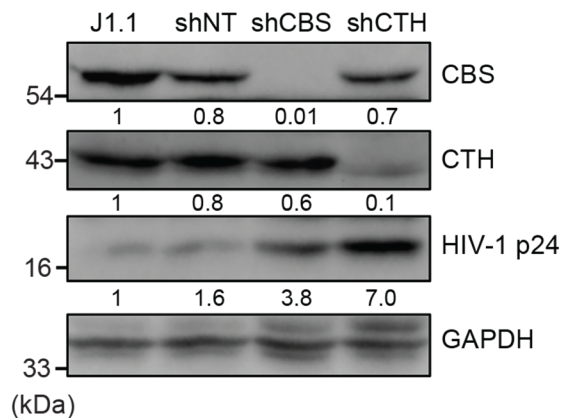

**F.**

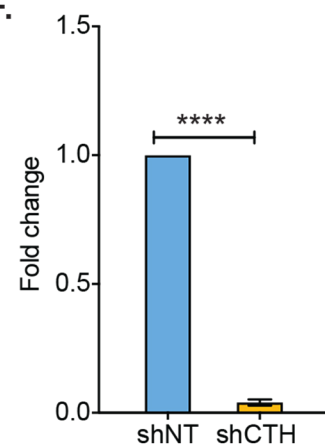

**G.**

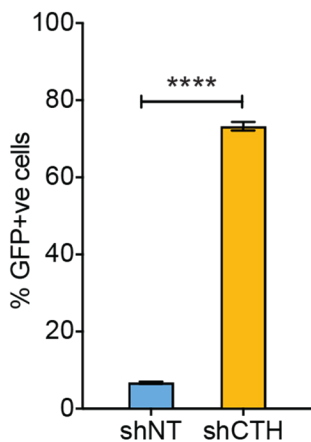

**H.**

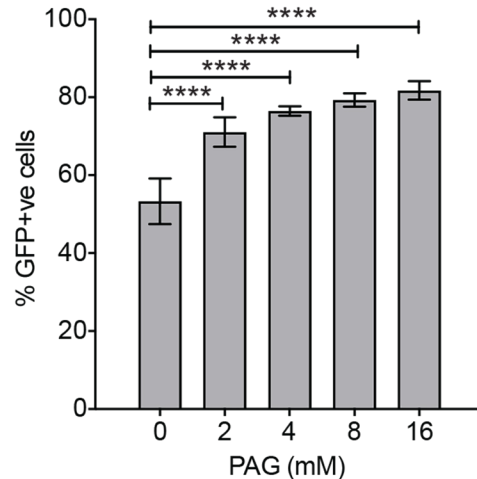

**I.**

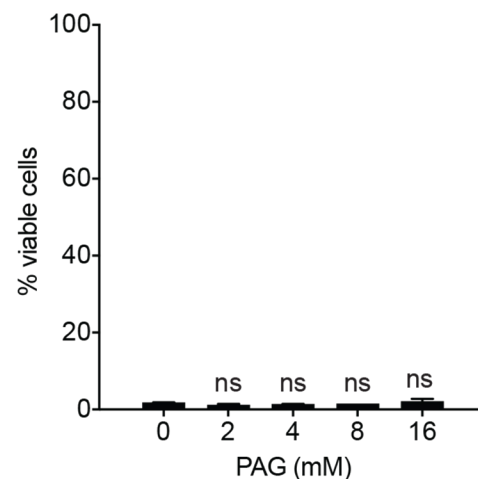

Supplement: supp [file elife-68487-supp-v1.zip]

**A.**

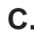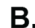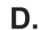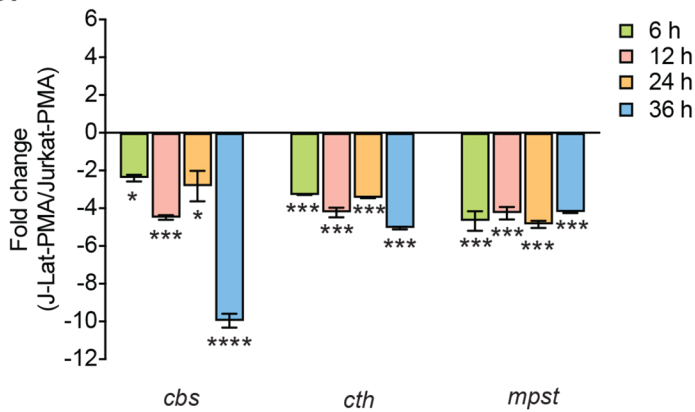

Supplement: supp [file elife-68487-supp-v1.zip]

# Figure 6-Figure supplement 2

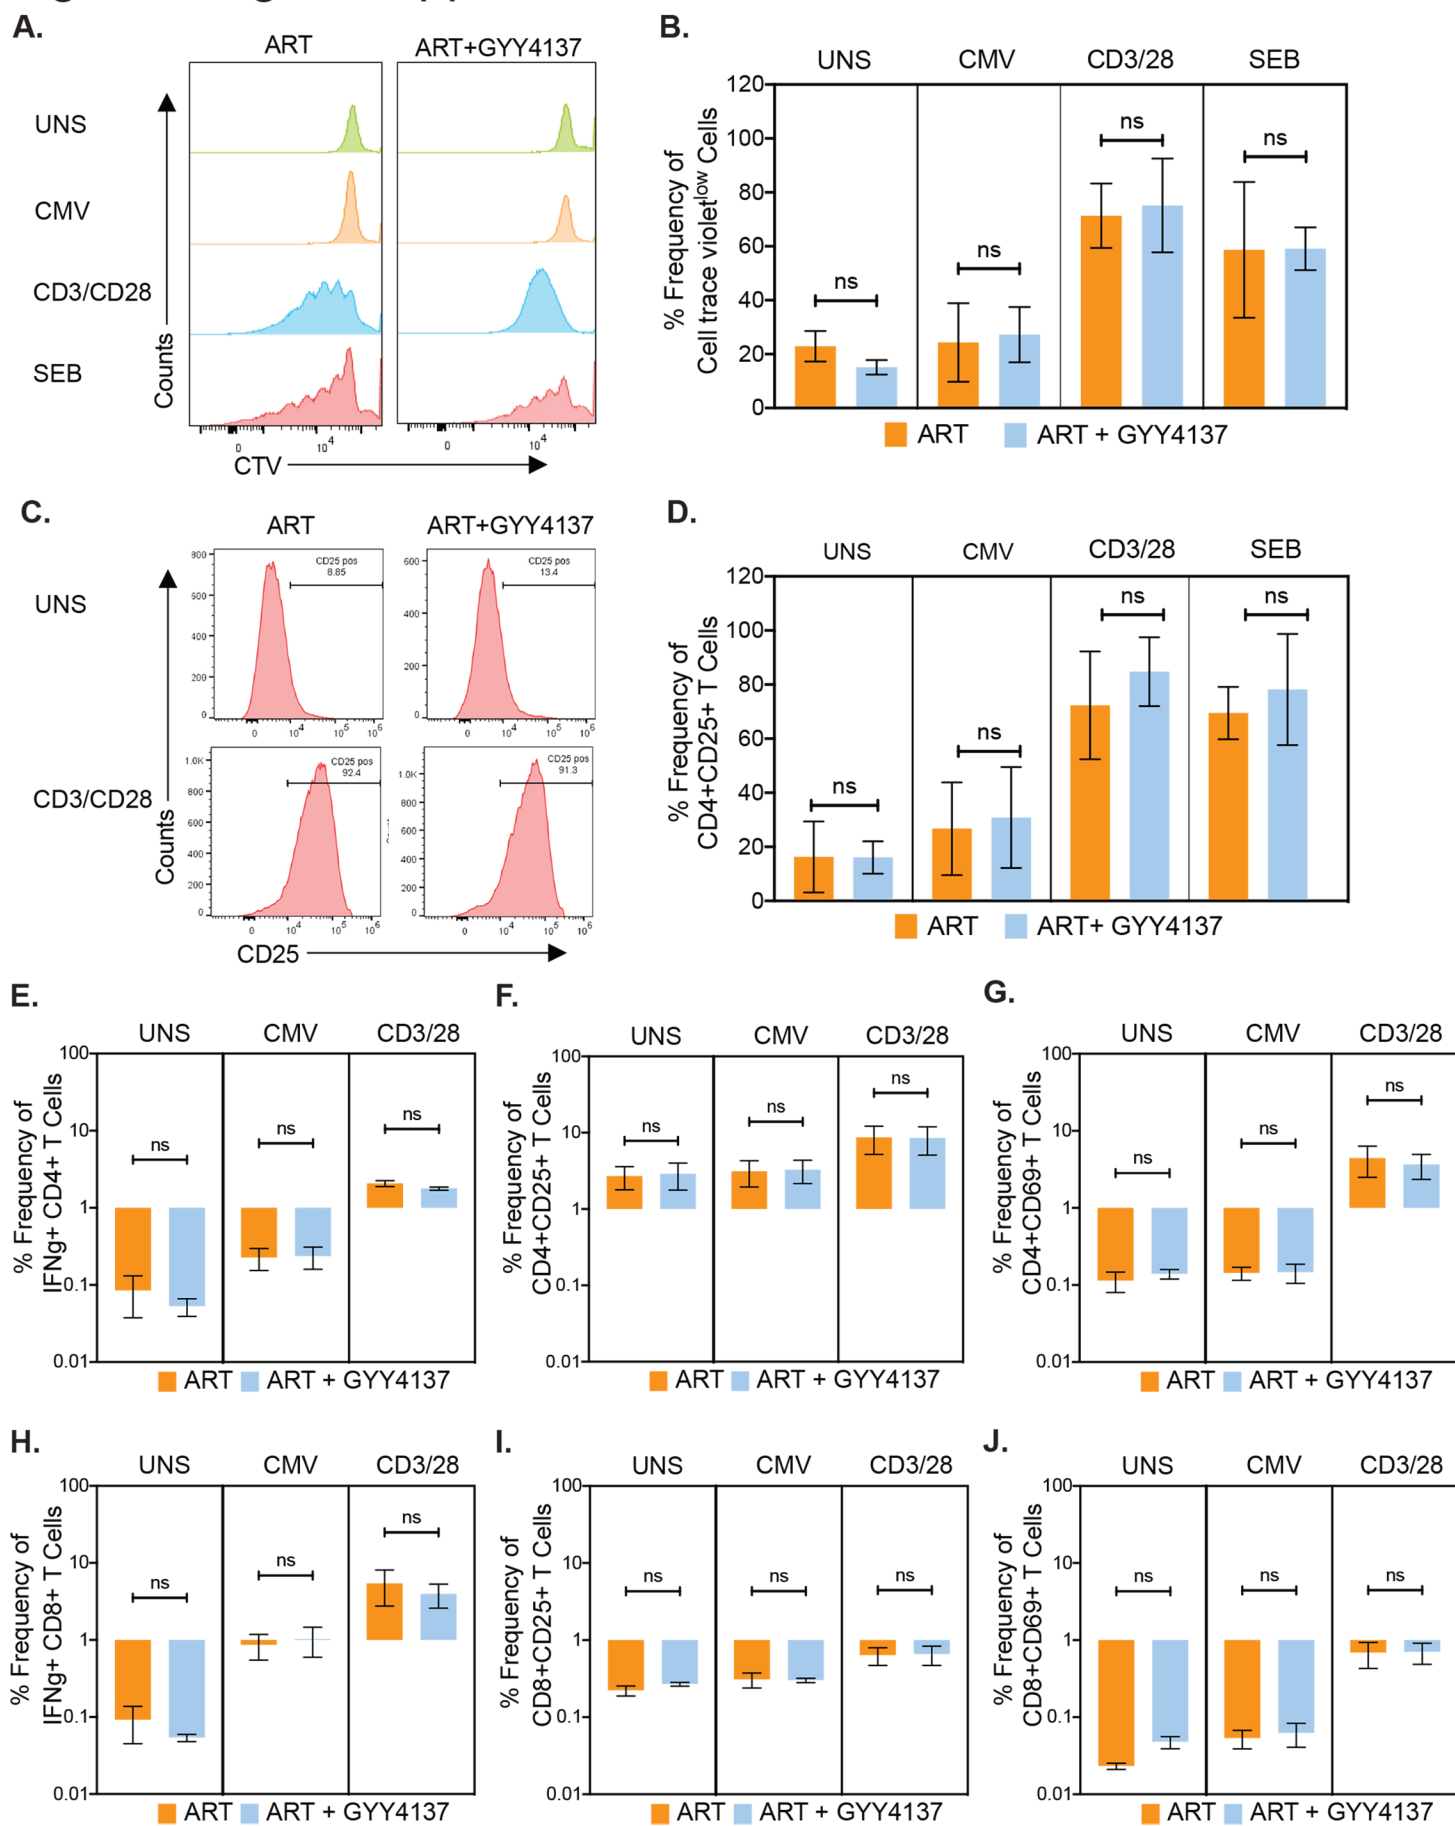

Supplement: supp [file elife-68487-supp-v1.zip]

# Figure 4-Figure supplement 1

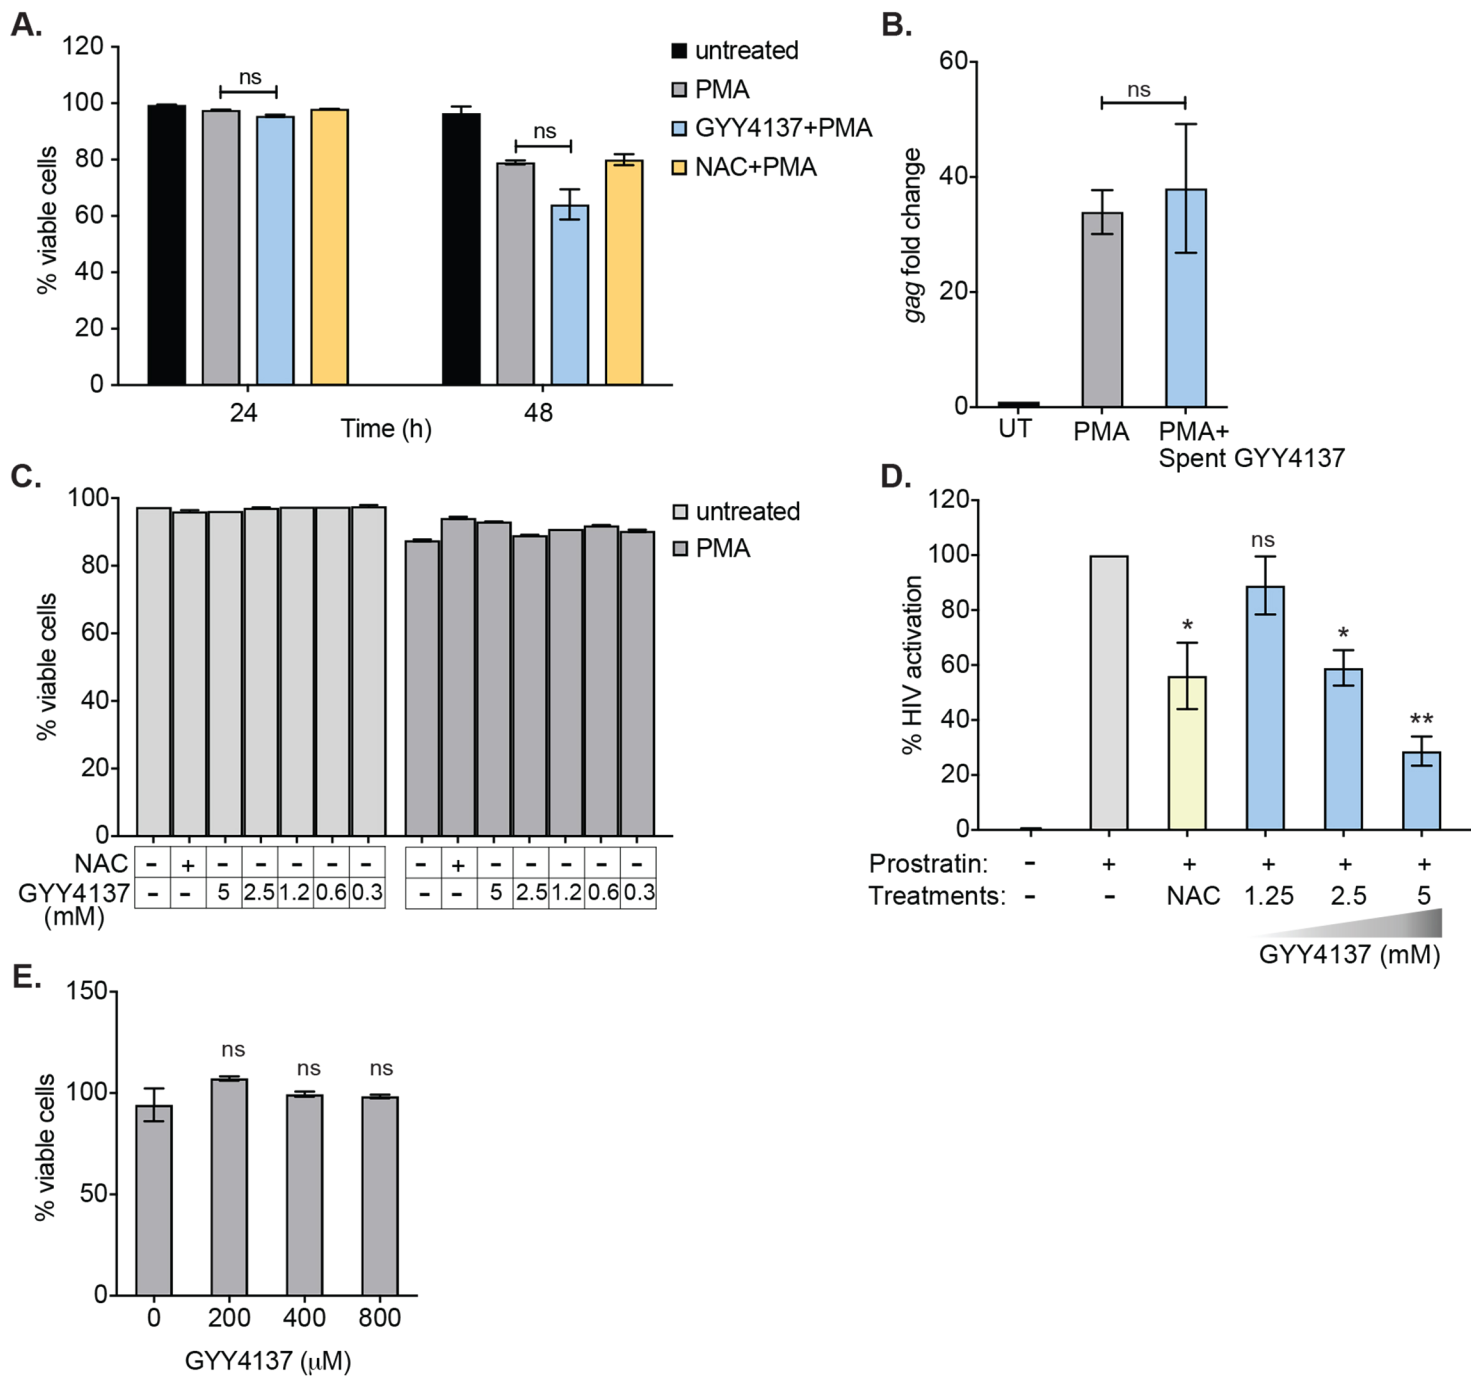

Supplement: supp [file elife-68487-supp-v1.zip]

# Figure 3-Figure supplement 1

A.

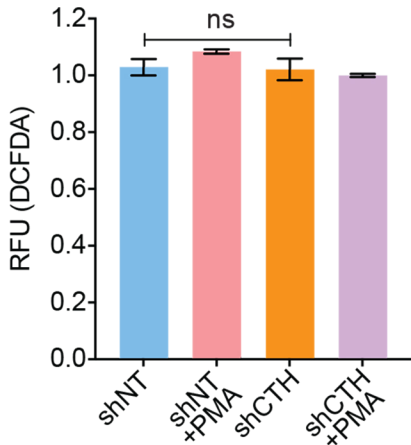

Supplement: supp [file elife-68487-supp-v1.zip]

# Figure 6-Figure supplement 3

A.

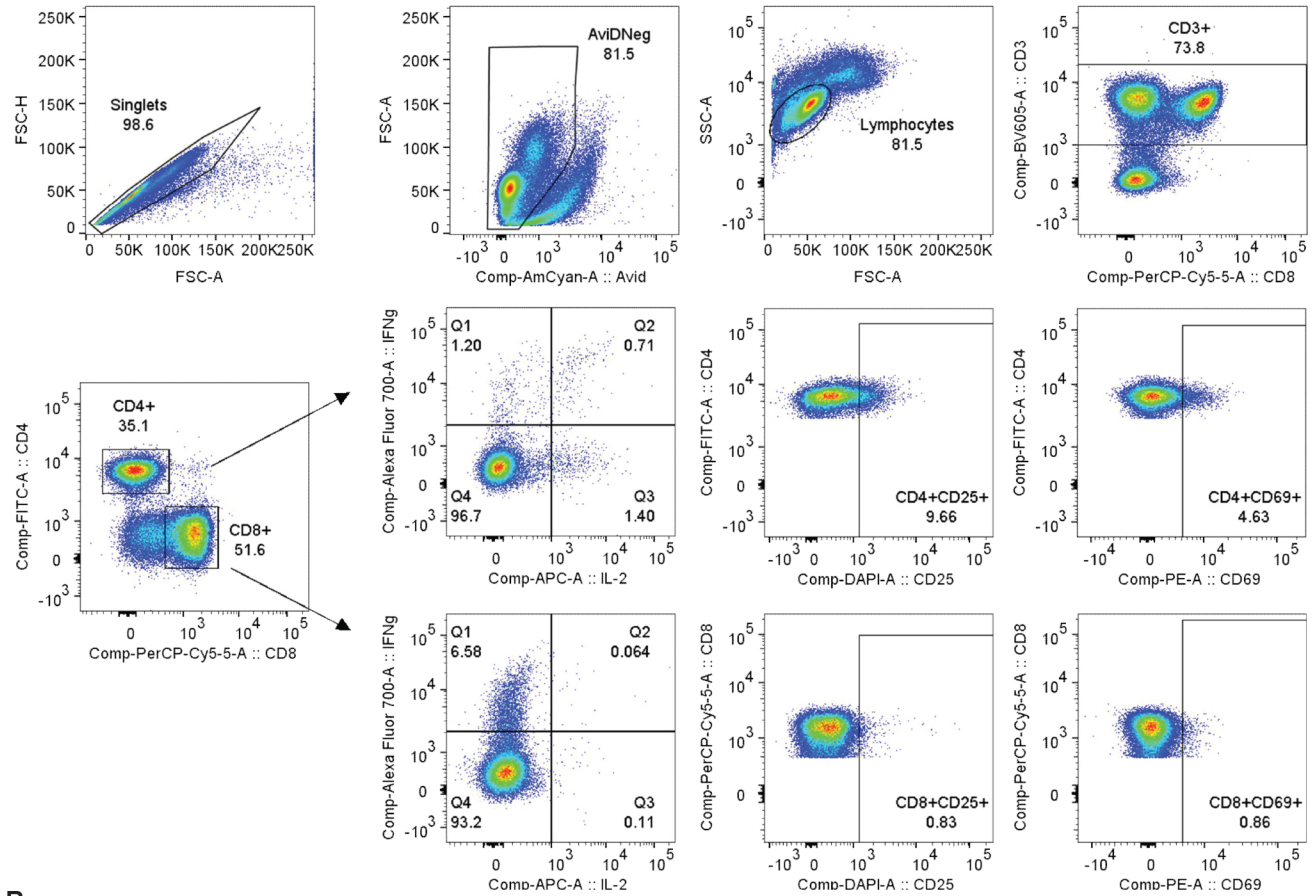

B.

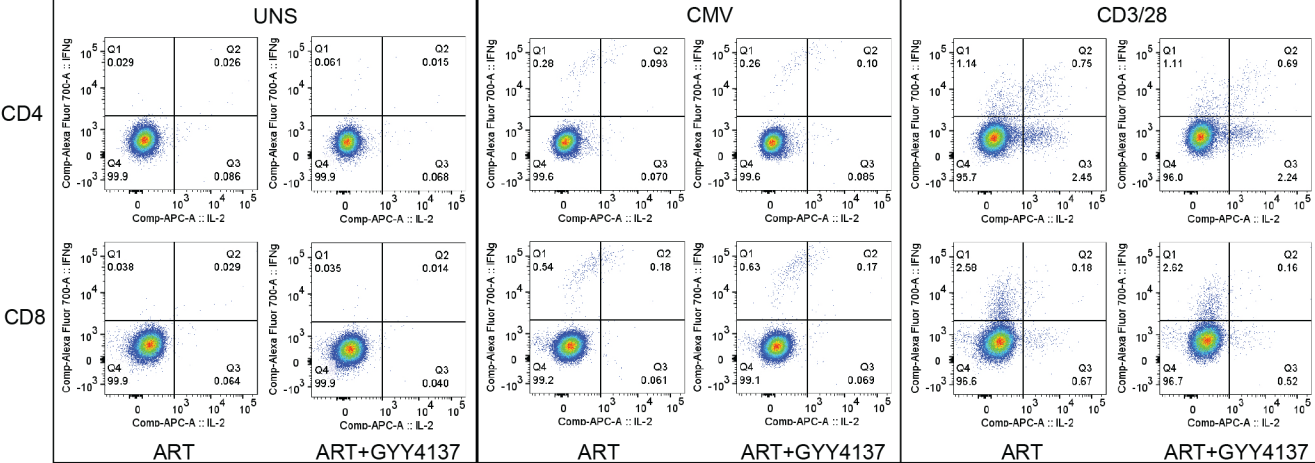

Supplement: supp [file elife-68487-supp-v1.zip]

# Figure 6-Figure supplement 1

**A.**

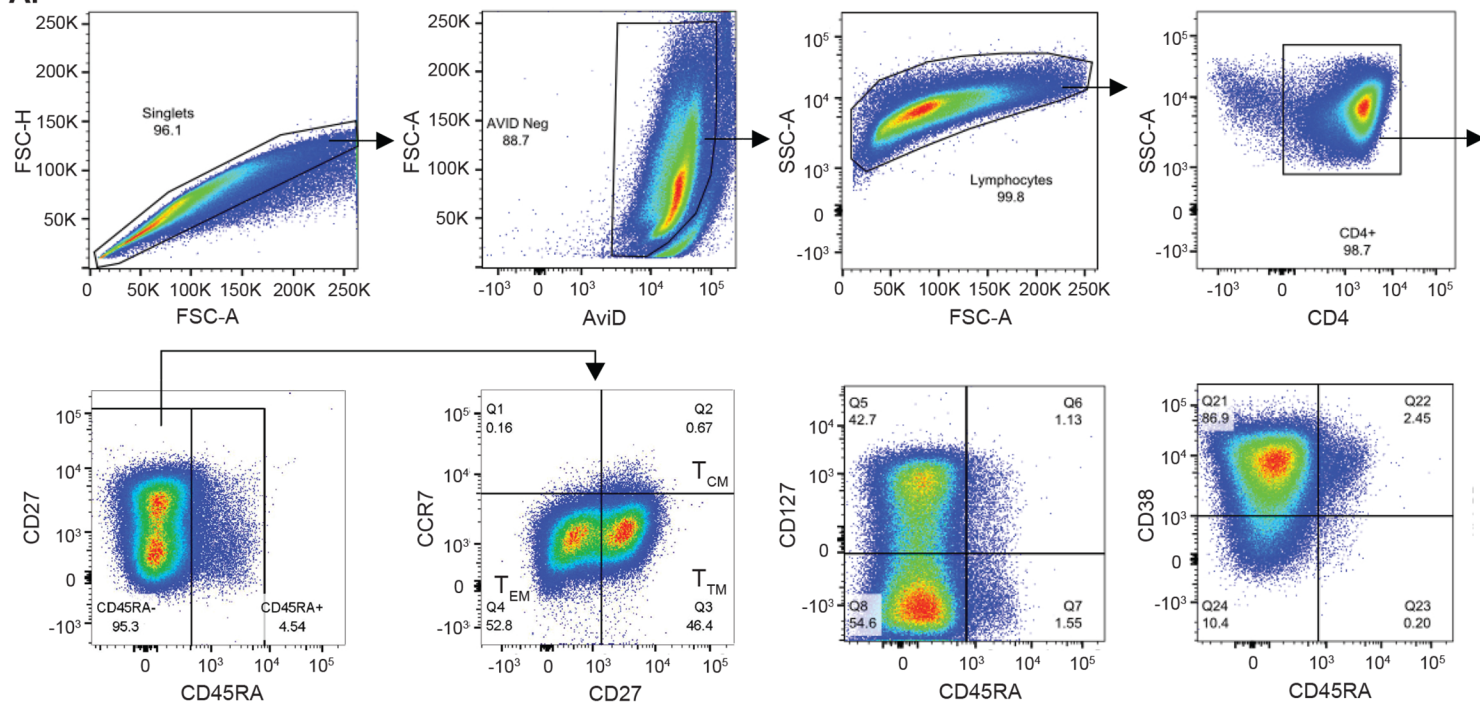

**B.**

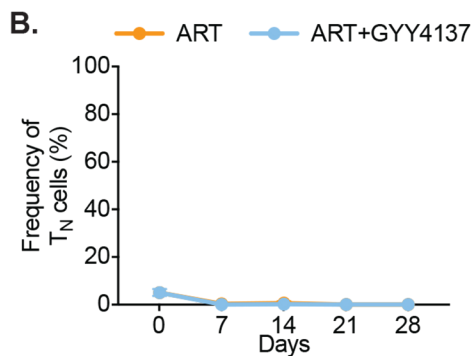

**C.**

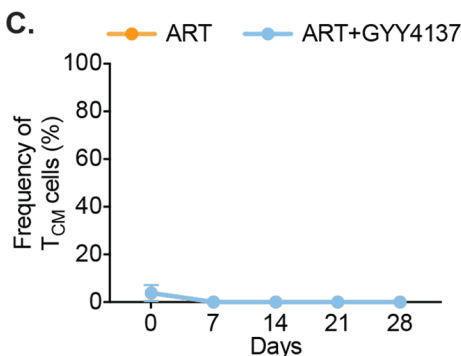

**D.**

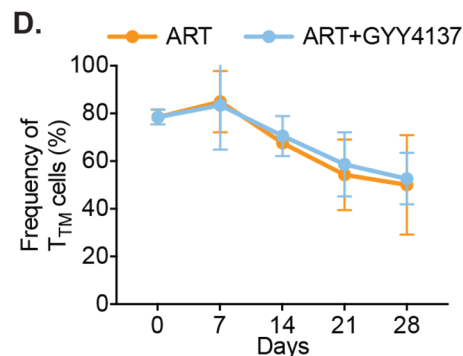

**E.**

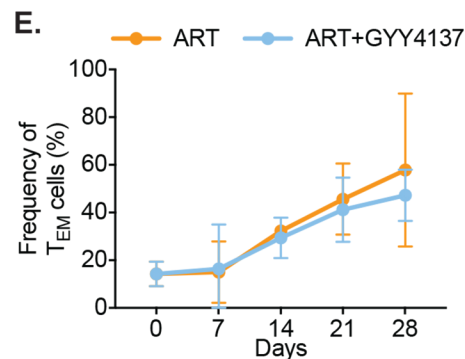

**F.**

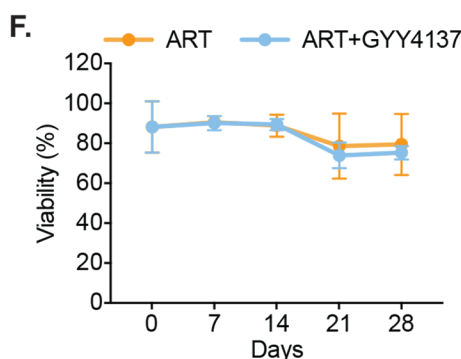

Supplement: supp [file elife-68487-supp-v1.zip]
